# Supplementary material for: Structure-guided product determination of the bacterial type II diterpene synthase Tpn2
Source: PubMed Central journal article supplement (PMC9814783; doi:10.1038/s42004-022-00765-6), 2022-11-08
Supplement: 42004_2022_765_MOESM2_ESM.pdf [file 42004_2022_765_MOESM2_ESM.pdf]

## Supplementary Information

### Structure-guided product determination of the bacterial type II diterpene synthase Tpn2

*Emma A. Stowell,<sup>a</sup> Michelle A. Ehrenberger,<sup>a</sup> Ya-Lin Lin,<sup>b</sup> Chin-Yuan Chang,<sup>\*b,c</sup> and Jeffrey D. Rudolf<sup>\*a</sup>*

<sup>a</sup>Department of Chemistry, University of Florida, Gainesville, Florida, 32611, USA

<sup>b</sup>Department of Biological Science and Technology, National Yang Ming Chiao Tung University, Hsinchu 30010, Taiwan, ROC

<sup>c</sup>Center for Intelligent Drug Systems and Smart Bio-devices, National Yang Ming Chiao Tung University, Hsinchu 30010, Taiwan, ROC

\*Correspondence to E-mail: [jrudolf@chem.ufl.edu](mailto:jrudolf@chem.ufl.edu); [cycytl@nctu.edu.tw](mailto:cycytl@nctu.edu.tw)

## Table of Contents

|                                                                                                                                                               |    |
|---------------------------------------------------------------------------------------------------------------------------------------------------------------|----|
| <b>Supplementary Table 1.</b> Strains used in this study.....                                                                                                 | 3  |
| <b>Supplementary Table 2.</b> Plasmids used in this study .....                                                                                               | 3  |
| <b>Supplementary Table 3.</b> Primers used in this study .....                                                                                                | 4  |
| <b>Supplementary Table 5.</b> <sup>1</sup> H NMR (600 MHz) and <sup>13</sup> C NMR (151 MHz) spectroscopic data for <i>syn</i> -sclarene ( <b>5</b> ).....    | 7  |
| <b>Supplementary Table 6.</b> Data collection and refinement statistics for Tpn2 (molecular replacement). ....                                                | 8  |
| <b>Supplementary Figure 1.</b> Bacterial type II TSs.....                                                                                                     | 9  |
| <b>Supplementary Figure 2.</b> SDS-PAGE analysis of purified proteins .....                                                                                   | 10 |
| <b>Supplementary Figure 3.</b> EI mass spectra of <b>2'</b> , <b>3</b> , and <b>5</b> .....                                                                   | 11 |
| <b>Supplementary Figure 4.</b> <sup>1</sup> H NMR spectrum of <b>2</b> in D <sub>2</sub> O (600 MHz).....                                                     | 12 |
| <b>Supplementary Figure 5.</b> <sup>31</sup> P NMR spectrum of <b>2</b> in D <sub>2</sub> O (243 MHz). ....                                                   | 13 |
| <b>Supplementary Figure 6.</b> Sequence alignment of selected bacterial and plant type II TSs .....                                                           | 14 |
| <b>Supplementary Figure 7.</b> HPLC chromatograms showing in vitro enzyme reactions of Tpn2 and mutants after desphosphorylation .....                        | 17 |
| <b>Supplementary Figure 8.</b> Scheme of the in vivo terpenoid upregulation system.....                                                                       | 18 |
| <b>Supplementary Figure 9.</b> HPLC analysis showing production of terpenetriene ( <b>3</b> ) in vivo using the MKI4 system.....                              | 19 |
| <b>Supplementary Figure 10.</b> <sup>1</sup> H NMR spectrum of terpenetriene ( <b>3</b> ) in CDCl <sub>3</sub> (600 MHz).....                                 | 20 |
| <b>Supplementary Figure 11.</b> <sup>13</sup> C NMR spectrum of terpenetriene ( <b>3</b> ) in CDCl <sub>3</sub> (151 MHz).....                                | 21 |
| <b>Supplementary Figure 12.</b> GC-MS analysis of in vivo products from Tpn2-Tpn3 and Tpn2 <sup>G485D</sup> -Tpn3 fusion proteins using the MKI4 system. .... | 22 |
| <b>Supplementary Figure 13.</b> <sup>1</sup> H NMR spectrum of α-springene ( <b>6</b> ) in CDCl <sub>3</sub> (600 MHz) .....                                  | 23 |
| <b>Supplementary Figure 14.</b> <sup>1</sup> H NMR spectrum of β-springene ( <b>7</b> ) in CDCl <sub>3</sub> (600 MHz).....                                   | 24 |
| <b>Supplementary Figure 15.</b> <sup>1</sup> H NMR spectrum of <i>syn</i> -sclarene ( <b>5</b> ) in CDCl <sub>3</sub> (600 MHz).....                          | 25 |
| <b>Supplementary Figure 16.</b> <sup>13</sup> C NMR spectrum of <i>syn</i> -sclarene ( <b>5</b> ) in CDCl <sub>3</sub> (151 MHz).....                         | 26 |
| <b>Supplementary Figure 17.</b> HSQC spectrum of <i>syn</i> -sclarene ( <b>5</b> ) in CDCl <sub>3</sub> .....                                                 | 27 |
| <b>Supplementary Figure 18.</b> HMBC spectrum of <i>syn</i> -sclarene ( <b>5</b> ) in CDCl <sub>3</sub> . ....                                                | 28 |
| <b>Supplementary Figure 19.</b> COSY spectrum of <i>syn</i> -sclarene ( <b>5</b> ) in CDCl <sub>3</sub> . ....                                                | 29 |
| <b>Supplementary Figure 20.</b> 2D NOESY spectrum of <i>syn</i> -sclarene ( <b>5</b> ) in CDCl <sub>3</sub> with key NOE correlations shown. ....             | 30 |
| <b>Supplementary Figure 21.</b> HPLC analysis of in vivo products from Tpn2 <sup>G485E</sup> -Tpn3.....                                                       | 31 |
| <b>Supplementary Figure 22.</b> Genome neighborhood network of bacterial type II TSs.....                                                                     | 32 |
| <b>Supplementary References</b> .....                                                                                                                         | 33 |

**Supplementary Table 1.** Strains used in this study

| Strain                              | Description                                                                                                    | Source (Reference)              |
|-------------------------------------|----------------------------------------------------------------------------------------------------------------|---------------------------------|
| <i>E. coli</i> NEB Turbo            | Host for general cloning                                                                                       | New England Biolabs             |
| <i>E. coli</i> NEB NiCo21           | Host for high-level protein production                                                                         | New England Biolabs             |
| <i>E. coli</i> BL21 Star (DE3)      | Host for high-level protein production                                                                         | Invitrogen                      |
| <i>Kitasatospora sp.</i><br>CB02891 | Putative terpentecin producer, used for isolation of genomic DNA for <i>ttn2</i> and <i>ttn3</i> amplification | Gift from Shen Lab <sup>1</sup> |

**Supplementary Table 2.** Plasmids used in this study

| Plasmid   | Description                                                                                                                                                                        | Source (Reference) |
|-----------|------------------------------------------------------------------------------------------------------------------------------------------------------------------------------------|--------------------|
| pRSF-Duet | General plasmid for cloning                                                                                                                                                        | Novagen            |
| pCDF-Duet | General plasmid for cloning                                                                                                                                                        | Novagen            |
| pET-Duet  | General plasmid for cloning                                                                                                                                                        | Novagen            |
| pUC19     | General plasmid for cloning                                                                                                                                                        | Novagen            |
| pET28a    | Plasmid for heterologous expression in <i>E. coli</i>                                                                                                                              | Novagen            |
| pBS3080   | Plasmid created from pRSF-duet by cloning the TEV/LIC sites; used for cloning and protein expression                                                                               | (2)                |
| pJR1064   | pET28a-MKI4: pET28a harboring kinases <i>Ec-ThiM</i> and <i>At-IPK</i> , <i>Ec-idi</i> , and GGPP synthase ( <i>bnd3</i> ). Ribosome binding sites were inserted before each gene. | (3)                |
| pJR2001   | pRSF/TEV/LIC harboring <i>ttn2</i>                                                                                                                                                 | This study         |
| pJR2002   | pRSF/TEV/LIC harboring <i>ttn2</i> (H180F)                                                                                                                                         | This study         |
| pJR2003   | pRSF/TEV/LIC harboring <i>ttn2</i> (H180V)                                                                                                                                         | This study         |
| pJR2004   | pRSF/TEV/LIC harboring <i>ttn2</i> (D296A)                                                                                                                                         | This study         |
| pJR2005   | pRSF/TEV/LIC harboring <i>ttn2</i> (Y329F)                                                                                                                                         | This study         |
| pJR2006   | pRSF/TEV/LIC harboring <i>ttn2</i> (H342A)                                                                                                                                         | This study         |
| pJR2007   | pRSF/TEV/LIC harboring <i>ttn2</i> (H342F)                                                                                                                                         | This study         |
| pJR2008   | pRSF/TEV/LIC harboring <i>ttn2</i> (H342A-D296A)                                                                                                                                   | This study         |
| pJR2009   | pRSF/TEV/LIC harboring <i>ttn2</i> (H342F-D296A)                                                                                                                                   | This study         |
| pJR2010   | pRSF/TEV/LIC harboring <i>ttn2</i> (K383A)                                                                                                                                         | This study         |
| pJR2011   | pRSF/TEV/LIC harboring <i>ttn2</i> (G485D)                                                                                                                                         | This study         |
| pJR2012   | pRSF/TEV/LIC harboring <i>ttn2</i> (Y489A)                                                                                                                                         | This study         |
| pJR2013   | pET-Duet harboring <i>ttn2</i> , <i>ttn3</i> , and <i>ttn6</i> for heterologous expression in <i>E. coli</i>                                                                       | This study         |
| pJR2014   | pCDF duet harboring <i>ttn2</i> for heterologous expression in <i>E. coli</i>                                                                                                      | This study         |

|         |                                                                                                                                   |            |
|---------|-----------------------------------------------------------------------------------------------------------------------------------|------------|
| pJR2015 | pCDF duet harboring <i>tpn2</i> (G485D) for heterologous expression in <i>E. coli</i>                                             | This study |
| pJR2016 | pCDF duet harboring <i>tpn2</i> and <i>tpn3</i> with an additional RBS for heterologous expression in <i>E. coli</i>              | This study |
| pJR2017 | pCDF duet harboring <i>tpn2</i> and <i>tpn3</i> linked with a glycine-serine linker for heterologous expression in <i>E. coli</i> | This study |
| pJR2018 | pCDF duet harboring <i>tpn2</i> (G485D) and <i>tpn3</i> for heterologous expression in <i>E. coli</i>                             | This study |
| pJR2019 | pCDF duet harboring <i>tpn2</i> (G485E) for heterologous expression in <i>E. coli</i>                                             | This study |
| pJR2020 | pCDF duet harboring <i>tpn2</i> (G485E) and <i>tpn3</i> for heterologous expression in <i>E. coli</i>                             | This study |

**Supplementary Table 3.** Primers used in this study

| Name       | Sequence                                       | Purpose                                                                      |
|------------|------------------------------------------------|------------------------------------------------------------------------------|
| pRSFtpn2_F | aaaacctctattccagtcgatgagtgacgccgatcggatag<br>c | <i>tpn2</i> or mutant amplification for protein expression in <i>E. coli</i> |
| pRSFtpn2_R | ctcgatcgcgctgggcatcagctacgtctcacgacgg          |                                                                              |
| H180F_F    | agacggcatggttcacactcgaggc                      | Tpn2 mutagenesis for H180F                                                   |
| H180F_R    | gcctcgagtgtgaacctgcccgtct                      |                                                                              |
| H180V_F    | agacggcatgggtcacactcgaggc                      | Tpn2 mutagenesis for H180V                                                   |
| H180V_R    | gcctcgagtgtgacctgcccgtct                       |                                                                              |
| D296A_F    | ccgcccgcaggggcccacacggcctac                    | Tpn2 mutagenesis for D296A                                                   |
| D296A_R    | gtaggccgtgctggcccgtcgggagg                     |                                                                              |
| Y329F_F    | cacttcgtttcgtttccgggggagcag                    | Tpn2 mutagenesis for Y329F                                                   |
| Y329F_R    | ctgctccccggaaacgaaacgaagtg                     |                                                                              |
| H342A_F    | ccgtgaacgcggcccccctcgagtac                     | Tpn2 mutagenesis for H342A                                                   |
| H342A_R    | gtactcgagggcgccgcgttcacgg                      |                                                                              |
| H342F_F    | ccgtgaacgcgttcgccctcgagtac                     | Tpn2 mutagenesis for H342F                                                   |
| H342F_R    | gtactcgagggcggaacgcgttcacgg                    |                                                                              |
| K383A_F    | ggctgctggtacgacgcatggaatgtctcggc               | Tpn2 mutagenesis for K383A                                                   |
| K383A_R    | cggcgagacattccatgcgtcgtaccagcagcc              |                                                                              |
| G485D_F    | ccgctgtggatggacaaggacctgtac                    | Tpn2 mutagenesis for G485D                                                   |
| G485D_R    | gtacaggtccttgccatccacagcgg                     |                                                                              |
| G485E_F    | ccgctgtggatggaaaaggacctgtac                    | Tpn2 mutagenesis for G485E                                                   |
| G485E_R    | gtacaggtcctttccatccacagcgg                     |                                                                              |
| Y489A_F    | caaggacctggccacgcctttccgga                     | Tpn2 mutagenesis for Y489A                                                   |
| Y489A_R    | tccggaaggcgtggccaggtccttg                      |                                                                              |

|                    |                                                    |                                                                                                                                |
|--------------------|----------------------------------------------------|--------------------------------------------------------------------------------------------------------------------------------|
| NcoI_ala_Tpn2_F    | aataaggagatataccatggcgagtgacgccgatcggatag<br>c     | <i>tpn2</i> WT amplification for in vivo expression                                                                            |
| Tpn3_Hind_R        | cattatgcgccccaagcttcagcggtagcggctgtct              | <i>tpn3</i> amplification for in vivo expression                                                                               |
| Tpn2-3_F           | gcaggcgcgccatgagtgacgccgatcggatagc                 | <i>tpn2</i> or mutant amplification for in vivo expression                                                                     |
| Tpn2_HindIII_R     | tagcaagcttcagtacctgctcacgacgg                      |                                                                                                                                |
| Tpn1-3_R           | cccaagcttcagcggtagcggctgtct                        |                                                                                                                                |
| Tpn2_RBSOP_R       | tatagccccctatgccttaaataca<br>tcagtacctgctcacgacgg  | <i>tpn2</i> or mutant amplification for in vivo expression and addition of RBS sequence between <i>tpn2</i> and <i>tpn3</i>    |
| RBSOP_Tpn3_F       | tgtatttaaggcatagggggcgtata<br>atgcccgacgcgatcgagtt |                                                                                                                                |
| Tpn2_GSlink_R      | agaaccgccagaaccagaaccgtacctgctcacgacggcg<br>c      | <i>tpn2</i> or mutant amplification for in vivo expression and addition of linker sequence between <i>tpn2</i> and <i>tpn3</i> |
| GSlink_Tpn3_F      | ggttctggttctggcggttctatcccgacgcgatcgagtt           |                                                                                                                                |
| Tpn6_F             | gcacatatgtacaccgataccgccgaac                       | <i>tpn6</i> amplification for in vivo expression                                                                               |
| Tpn6_R             | ggtaattaatcagtggttctgagagcgac                      |                                                                                                                                |
| GSlink_tpn3_teda_F | ccgcttccggaggtgctggttctggttctggcggttct             | <i>tpn3</i> amplification for in vivo expression                                                                               |
| Tpn3_teda_R        | gactctagaggatccccgggtcagcggtagcggctgtct            |                                                                                                                                |

**Supplementary Table 4.**  $^1\text{H}$  NMR (600 MHz) and  $^{13}\text{C}$  NMR (151 MHz) spectroscopic data for TPP (**2**) and terpenetriene (**3**).<sup>a</sup>

| No.                 | <b>2</b> <sup>b</sup>                    |  | <b>3</b> <sup>c</sup> |                                                             |
|---------------------|------------------------------------------|--|-----------------------|-------------------------------------------------------------|
|                     | $\delta_{\text{H}}$                      |  | $\delta_{\text{C}}$   | $\delta_{\text{H}}$                                         |
| 1, CH <sub>2</sub>  | 1.62 (dd, $J = 12.7, 6.4$ );<br>1.33 (m) |  | 17.8                  | 1.43 (m); 1.67 (m)                                          |
| 2, CH <sub>2</sub>  | 1.89 (m); 1.95 (m)                       |  | 26.8                  | 2.00 (m); 2.15 (m)                                          |
| 3, CH               | 5.21 (br s)                              |  | 120.2                 | 5.17 (ddd, $J = 4.5, 2.7, 1.3$ )                            |
| 4, qC               |                                          |  | 144.5                 |                                                             |
| 5, qC               |                                          |  | 38.3                  |                                                             |
| 6, CH <sub>2</sub>  | 1.35 (m)                                 |  | 30.2                  | 1.46 (m); 1.50 (m)                                          |
| 7, CH <sub>2</sub>  | 1.22 (m), 1.89 (m)                       |  | 25.6                  | 1.32 (dq, $J = 13.9, 3.3$ );<br>1.96 (m)                    |
| 8, CH               | 1.47 (m)                                 |  | 35.2                  | 1.69 (m)                                                    |
| 9, qC               |                                          |  | 37.7                  |                                                             |
| 10, CH              | 1.35 (m)                                 |  | 45.1                  | 1.45 (m)                                                    |
| 11, CH <sub>2</sub> | 1.08 (m), 1.47 (m)                       |  | 38.3                  | 1.20 (td, $J = 12.8, 4.6$ );<br>1.64 (m)                    |
| 12, CH <sub>2</sub> | 1.95 (m)                                 |  | 24.6                  | 2.22 (m); 2.18 (m)                                          |
| 13, qC              |                                          |  | 147.8                 |                                                             |
| 14, CH              | 5.41 (m)                                 |  | 139.2                 | 6.40 (dd, $J = 17.6, 10.9$ )                                |
| 15, CH <sub>2</sub> | 4.38 (t, $J = 6.4$ )                     |  | 113.0                 | 5.07 (dq, $J = 10.8, 1.0$ );<br>5.27 (dd, $J = 17.6, 1.2$ ) |
| 16, CH <sub>3</sub> | 1.65 (d, $J = 1.5$ )                     |  | 115.2                 | 5.02 (s)                                                    |
| 17, CH <sub>3</sub> | 0.85 (d, $J = 6.7$ )                     |  | 14.9                  | 0.98 (s)                                                    |
| 18, CH <sub>3</sub> | 0.98 (s)                                 |  | 20.6                  | 1.08 (s)                                                    |
| 19, CH <sub>3</sub> | 1.53 (s)                                 |  | 18.0                  | 1.61 (m)                                                    |
| 20, CH <sub>3</sub> | 0.86 (s)                                 |  | 20.4                  | 0.99 (br s)                                                 |

<sup>a</sup>  $\delta$  in ppm,  $J$  in Hz

<sup>b</sup> NMR taken in D<sub>2</sub>O

<sup>c</sup> NMR taken in CDCl<sub>3</sub>

**Supplementary Table 5.**  $^1\text{H}$  NMR (600 MHz) and  $^{13}\text{C}$  NMR (151 MHz) spectroscopic data for *syn*-sclarene (**5**).<sup>a</sup>

| No.                 | <b>5</b> <sup>b</sup> |                                                             |
|---------------------|-----------------------|-------------------------------------------------------------|
|                     | $\delta_{\text{C}}$   | $\delta_{\text{H}}$                                         |
| 1, CH <sub>2</sub>  | 36.7                  | 1.08 (m); 1.58 (m)                                          |
| 2, CH <sub>2</sub>  | 19.2                  | 1.46 (m); 1.65 (m)                                          |
| 3, CH               | 42.7                  | 1.18 (td, $J = 13.2, 3.6$ ); 1.42 (m)                       |
| 4, qC               | 33.2                  |                                                             |
| 5, qC               | 45.8                  | 1.32 (m)                                                    |
| 6, CH <sub>2</sub>  | 23.7                  | 1.33 (m); 1.64 (m)                                          |
| 7, CH <sub>2</sub>  | 31.62                 | 2.13 (m); 2.22 (m)                                          |
| 8, CH               | 149.3                 |                                                             |
| 9, qC               | 58.4                  | 1.61 (m)                                                    |
| 10, CH              | 38.0                  |                                                             |
| 11, CH <sub>2</sub> | 25.2                  | 1.53 (m); 1.75 (m)                                          |
| 12, CH <sub>2</sub> | 30.3                  | 1.95 (m); 2.16 (m)                                          |
| 13, qC              | 147.2                 |                                                             |
| 14, CH              | 139.0                 | 6.38 (dd, $J = 17.6, 10.8$ )                                |
| 15, CH <sub>2</sub> | 113.1                 | 5.06 (dq, $J = 10.9, 1.2$ );<br>5.22 (dd, $J = 17.6, 1.1$ ) |
| 16, CH <sub>3</sub> | 115.5                 | 5.02 (s)                                                    |
| 17, CH <sub>3</sub> | 109.6                 | 4.59 (dd, $J = 2.8, 1.7$ );<br>4.75 (t, $J = 2.4$ )         |
| 18, CH <sub>3</sub> | 22.2                  | 0.88 (s)                                                    |
| 19, CH <sub>3</sub> | 33.5                  | 0.89 (s)                                                    |
| 20, CH <sub>3</sub> | 22.4                  | 0.95 (s)                                                    |

<sup>a</sup>  $\delta$  in ppm,  $J$  in Hz

<sup>b</sup> NMR taken in CDCl<sub>3</sub>

**Supplementary Table 6.** Data collection and refinement statistics for Tpn2 (molecular replacement).

|                                                      | Tpn2                   |
|------------------------------------------------------|------------------------|
| <b>Data collection</b>                               |                        |
| Space group                                          | P3 <sub>1</sub>        |
| Cell dimensions                                      |                        |
| <i>a</i> , <i>b</i> , <i>c</i> (Å)                   | 92.54, 92.54, 127.91   |
| $\alpha$ , $\beta$ , $\gamma$ (°)                    | 90.00, 90.00, 120.00   |
| Resolution (Å)                                       | 30.00–2.57 (2.67–2.57) |
| <i>R</i> <sub>sym</sub> or <i>R</i> <sub>merge</sub> | 12.0 (60.3)            |
| <i>I</i> / $\sigma$ <i>I</i>                         | 15.7 (3.8)             |
| Completeness (%)                                     | 99.3 (100.0)           |
| Redundancy                                           | 4.7 (5.6)              |
| <b>Refinement</b>                                    |                        |
| Resolution (Å)                                       | 30.00–2.57             |
| No. reflections                                      | 38716                  |
| <i>R</i> <sub>work</sub> / <i>R</i> <sub>free</sub>  | 0.256/0.288            |
| No. atoms                                            |                        |
| Protein                                              | 7443                   |
| Water                                                | 159                    |
| <i>B</i> -factors                                    |                        |
| Protein                                              | 57.8                   |
| Water                                                | 50.2                   |
| R.m.s. deviations                                    |                        |
| Bond lengths (Å)                                     | 0.0047                 |
| Bond angles (°)                                      | 1.36                   |



**Supplementary Fig. 1. Bacterial type II TSs.**

**Tpn2**  
(*K. sp.* CB02891)  
**Cyc1**  
(*K. griseola*)

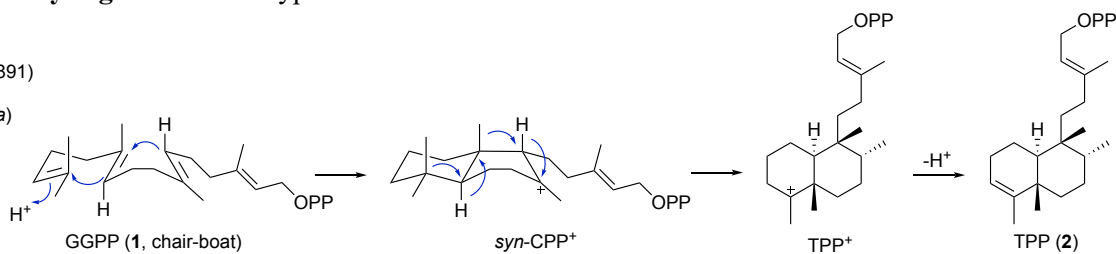

**Haur\_2145**  
(*H. aurantiacus*)

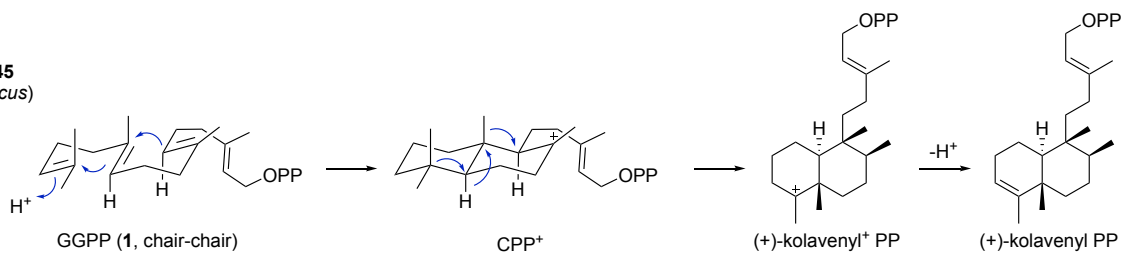

**PtmT2**  
(*S. platensis*)  
**ent-CDPS**  
(*Streptomyces spp.*)  
**BjCPS**  
(*B. japonicum*)

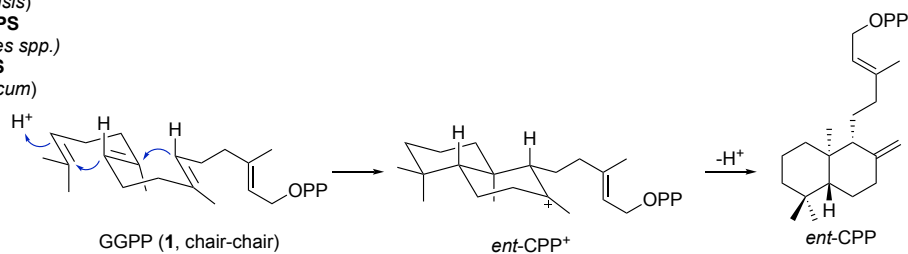

**RmnB**  
(*S. anulatus*)  
**CldB**  
(*S. cylabdanicus*)

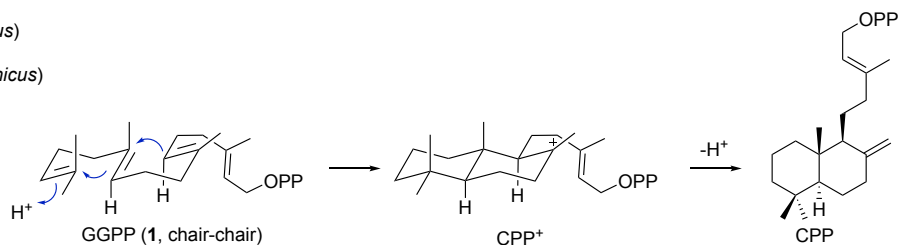

**SCLAV\_p0490**  
(*S. clavuligerus*)

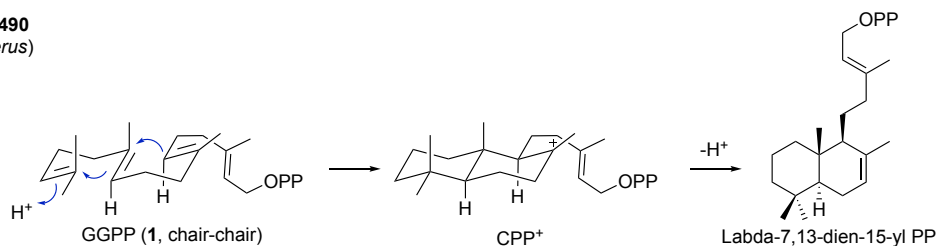

**Rv3377c**  
(*M. tuberculosis*)

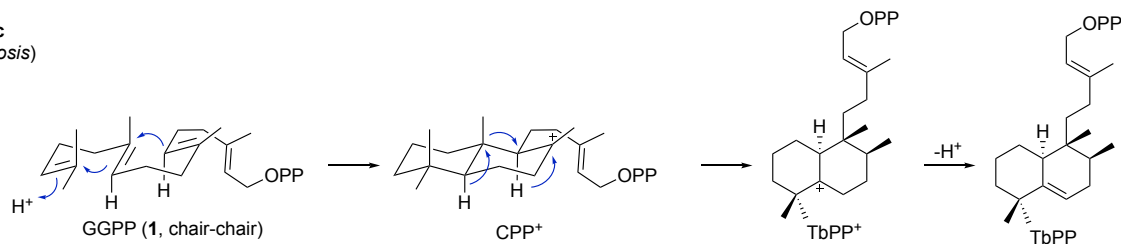

**Supplementary Fig. 2.** SDS-PAGE analysis of purified proteins. Expected size of Tpn2 is 56 kDa. Protein size analyzed using Fisher BioReagents™ EZ-Run™ Prestained Rec Protein Ladder.

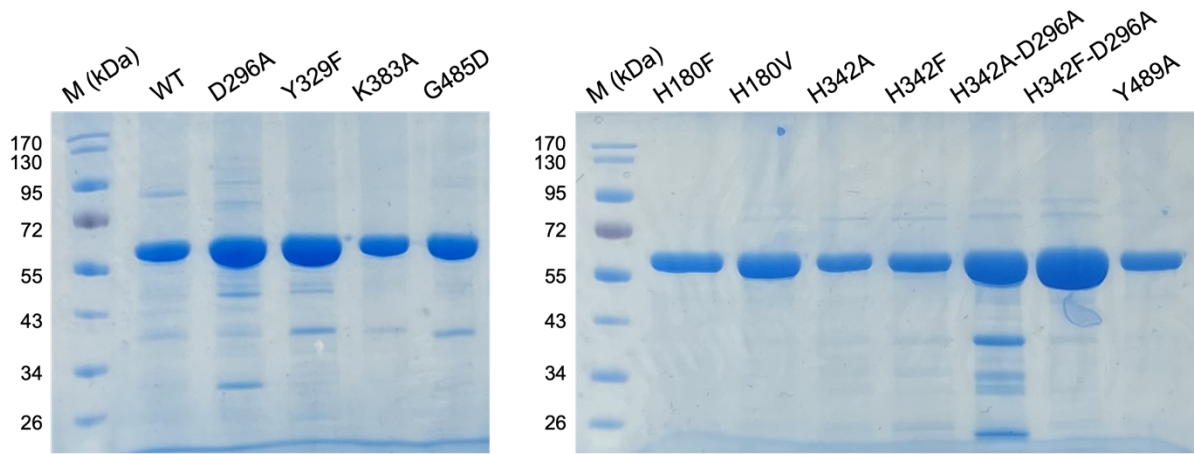

**Supplementary Fig. 3.** EI mass spectra of **2'**, **3**, and **5**. (a) EIMS **2'**:  $m/z$  (%): 95 (100), 107 (69), 120 (35), 41 (32), 69 (28), 189 (23), 257 (3), 290 ( $M^+$ , 3). (b) EIMS **3**:  $m/z$  (%): 107 (100), 95 (80), 120 (75), 189 (69), 41 (55), 79 (54), 67 (43), 55 (40), 132 (26), 159 (26), 257 (13), 272 ( $M^+$ , 3). (c) EIMS **5**:  $m/z$  (%): 69 (100), 41 (85), 81 (81), 93 (79), 109 (72), 257 (57), 55 (54), 123 (42), 149 (32), 272 ( $M^+$ , 7).

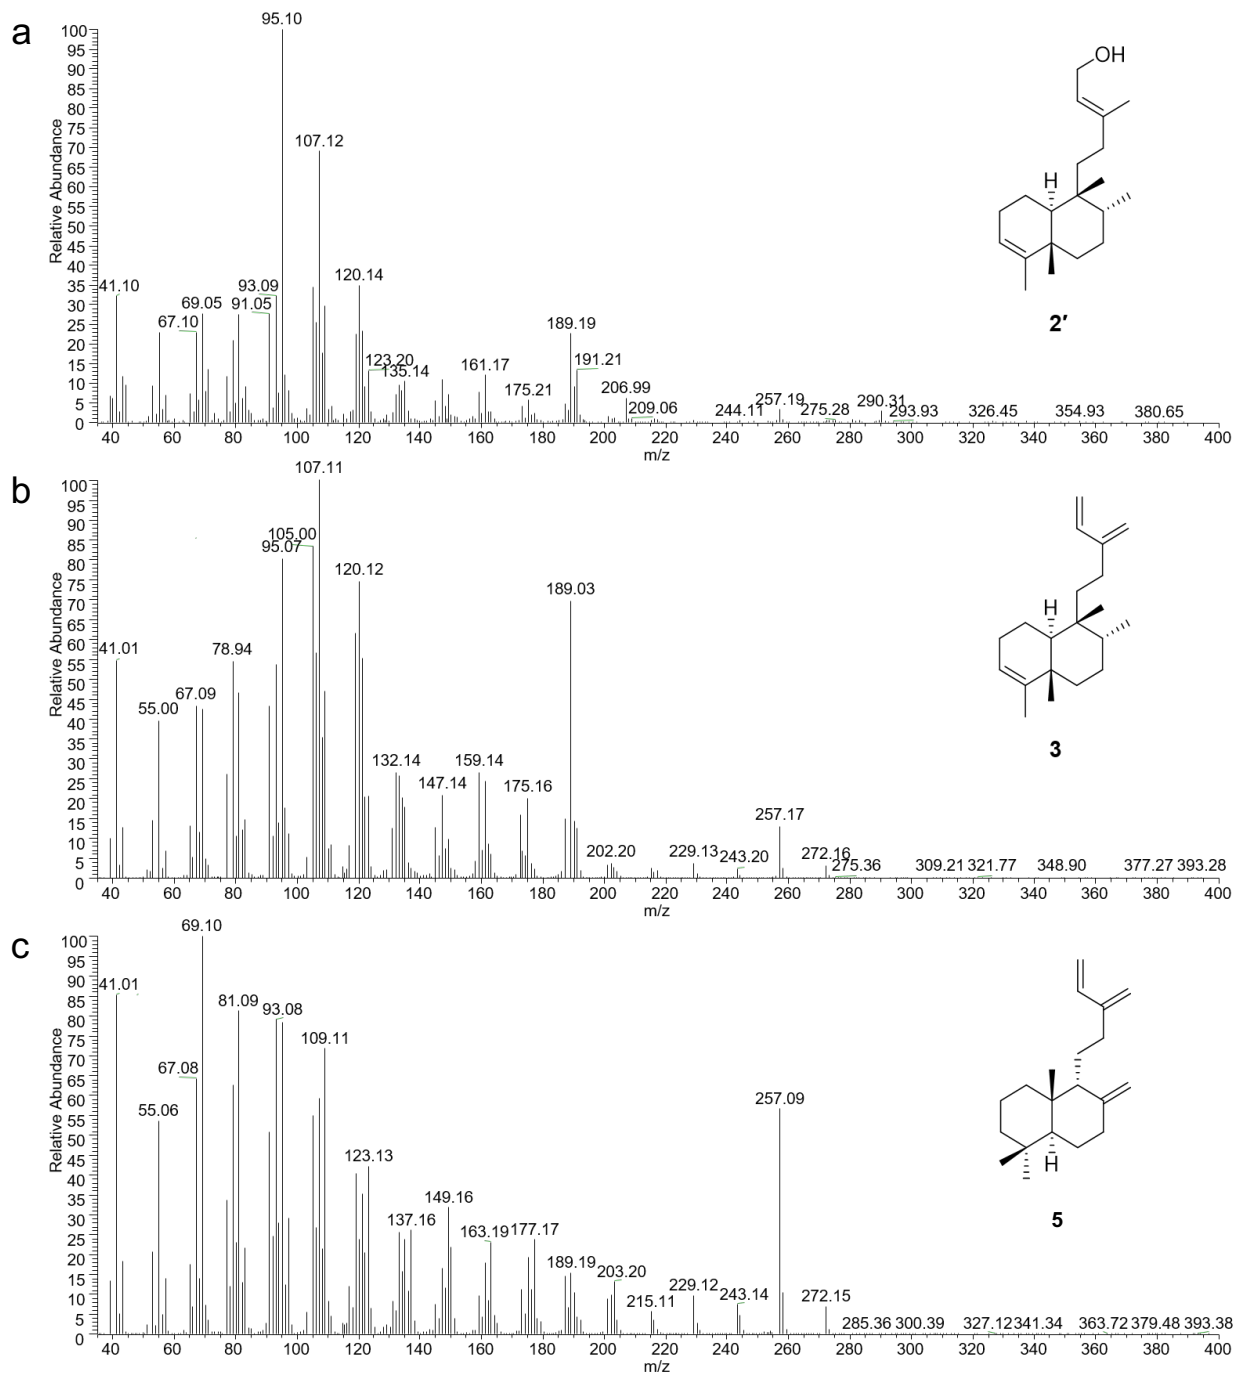

**Supplementary Fig. 4.**  $^1\text{H}$  NMR spectrum of **2** in  $\text{D}_2\text{O}$  (600 MHz). TPP (**2**) was isolated in the presence of glycerol; peaks marked with asterisks.

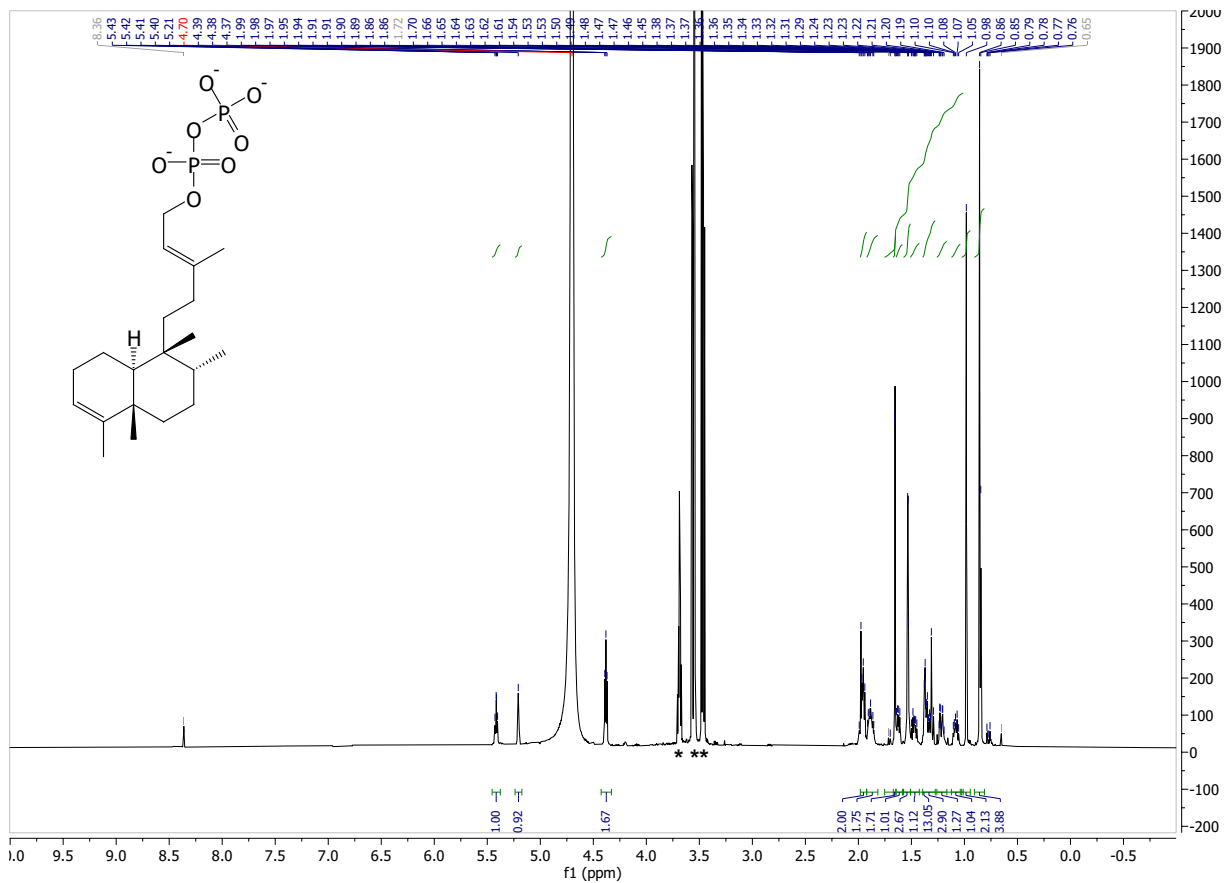

Supplementary Fig. 5.  $^{31}\text{P}$  NMR spectrum of **2** in  $\text{D}_2\text{O}$  (243 MHz).

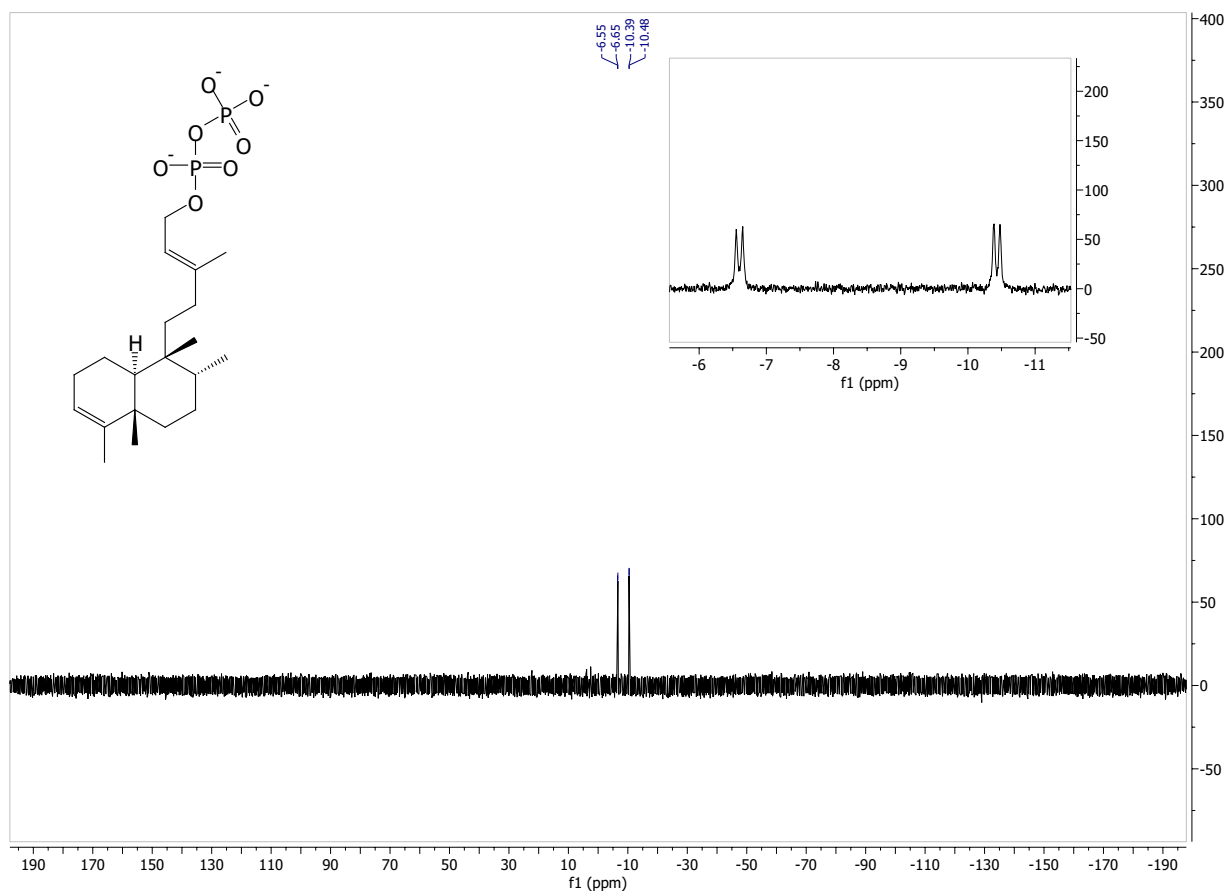

**Supplementary Fig. 6.** Sequence alignment of selected bacterial and plant type II TSs. Residues are colored based on conservation (identity: red box with white residue; similarity: red residue; similar across group: blue frame). The secondary structure of Tpn2 is shown above the alignment. The DxDD motif is in a black frame, residues mutated in this study are in green, and DxxxxE is in blue. The alignment was created with Clustal Omega<sup>4</sup> and rendered with ESPript.<sup>5</sup> The  $\alpha$  domain of AtCPS was removed.

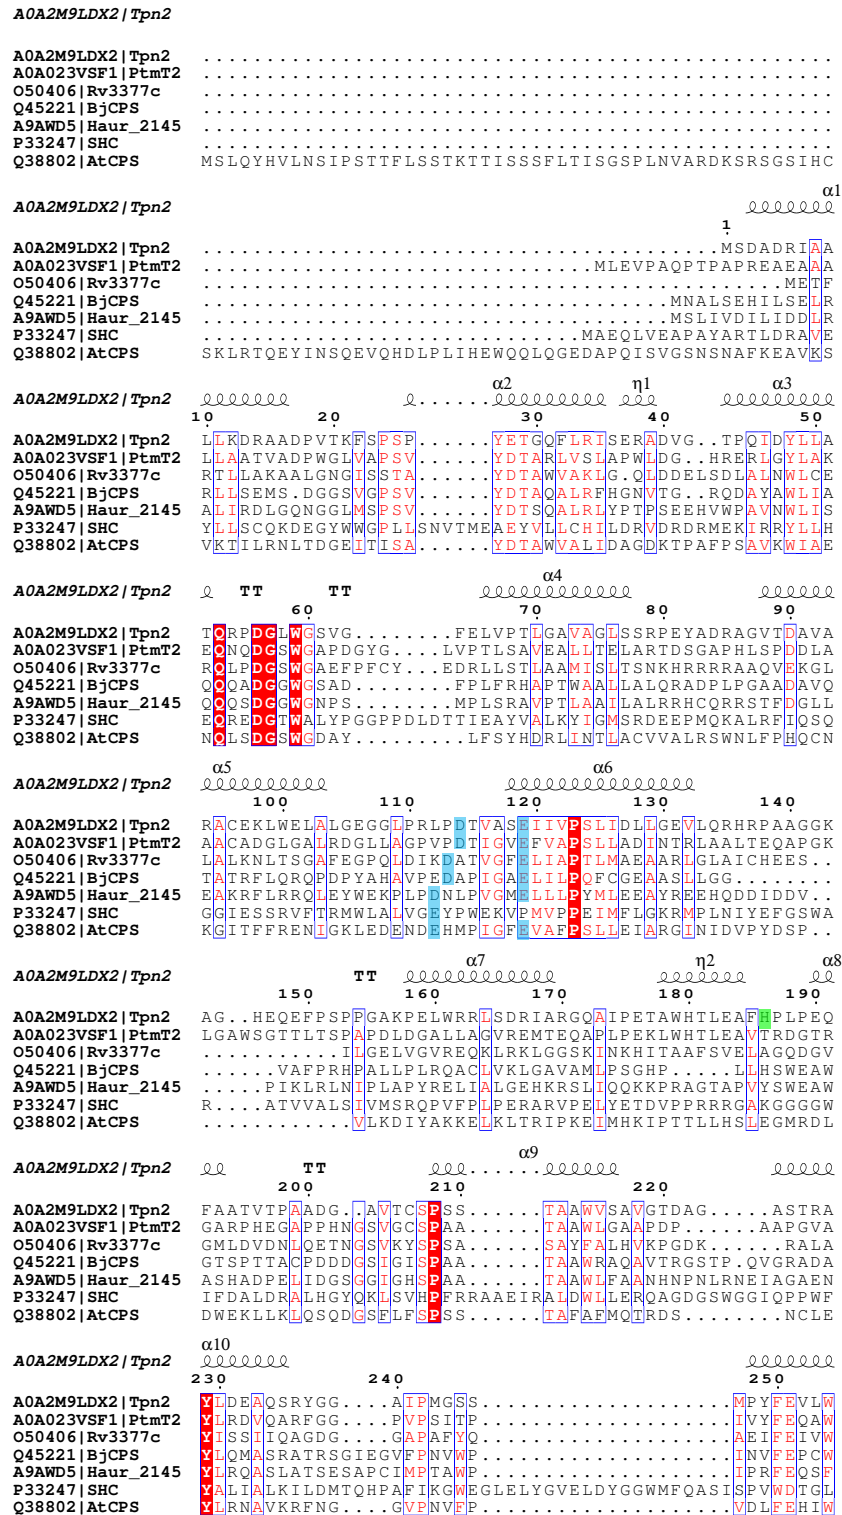

Supplementary Fig. 6 cont. Sequence alignment of selected bacterial and plant type II TSs.

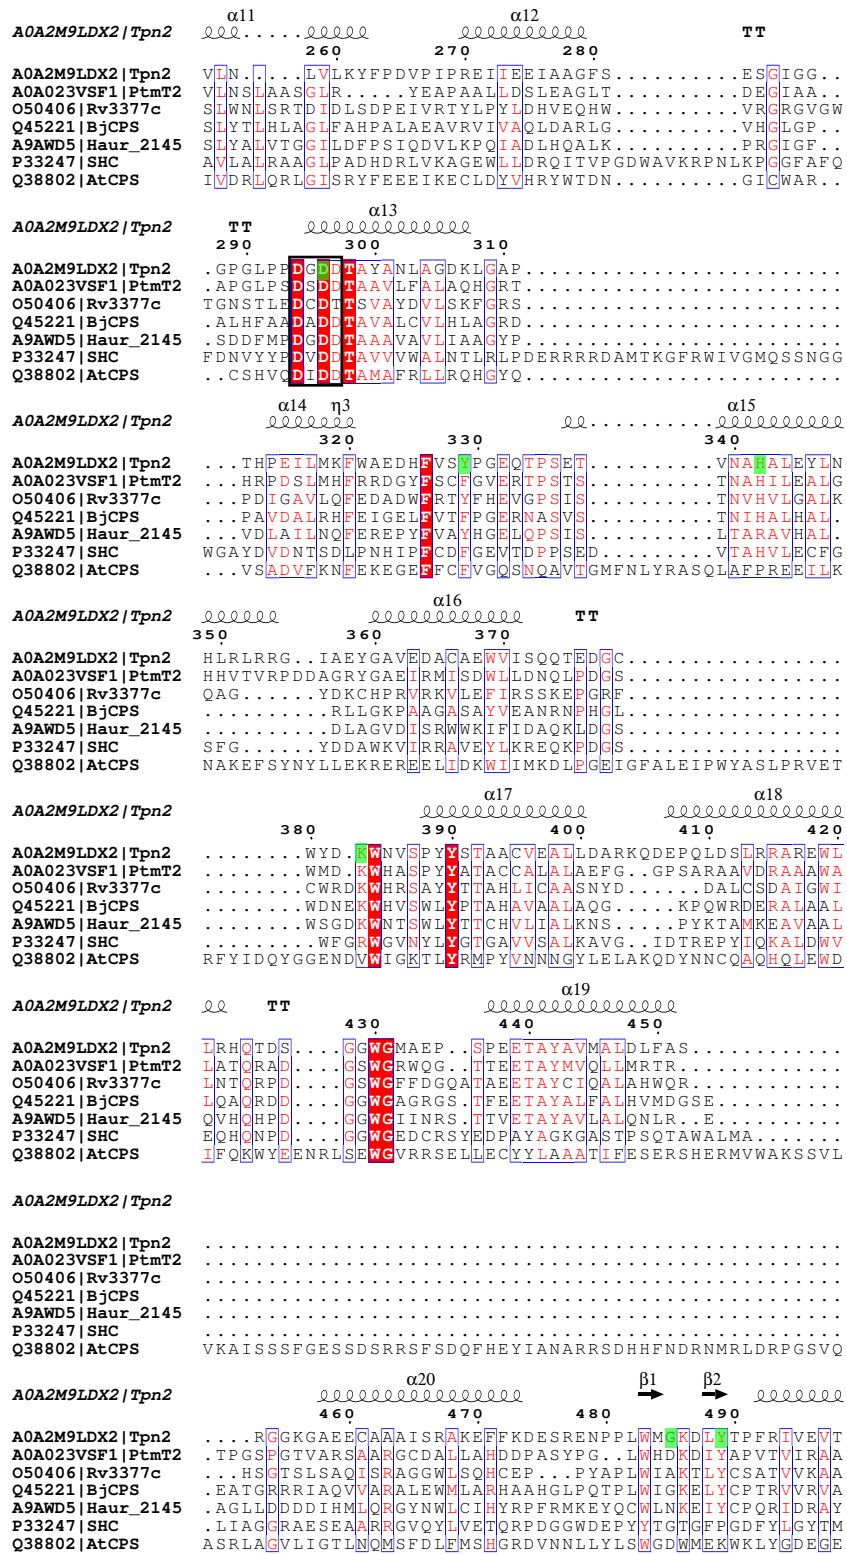

**Supplementary Fig. 6 cont.** Sequence alignment of selected bacterial and plant type II TSs.

```

                                α21
A0A2M9LDX2 | Tpn2             00000000
                                500
A0A2M9LDX2 | Tpn2             VMCGRAVVSRY.....
A0A023VSF1 | PtmT2            RLAAALALGGAASAAASGGA.....
O50406 | Rv3377c              ILSALRLVDESNQ.....
Q45221 | BjCPS                 ELAGLWLA LRWGRRVLAEGAGAAP.....
A9AWD5 | Haur_2145            ELS.AMLAVTLGELKL.....
P33247 | SHC                   YRHVFPITLALGRYKQAIERR.....
Q38802 | AtCPS                 GELMVKMIILMKNNDLTNFFTHFVRLAEIINRICLPRQYLKARRNDEK

A0A2M9LDX2 | Tpn2
A0A2M9LDX2 | Tpn2             .....
A0A023VSF1 | PtmT2            .....
O50406 | Rv3377c              .....
Q45221 | BjCPS                 .....
A9AWD5 | Haur_2145            .....
P33247 | SHC                   .....
Q38802 | AtCPS                 EKTIKSMEKEMGKMKVELALSESDTFRDVSITFLDVAKAFYYFALCGDHLQ

A0A2M9LDX2 | Tpn2
A0A2M9LDX2 | Tpn2             .....
A0A023VSF1 | PtmT2            .....
O50406 | Rv3377c              .....
Q45221 | BjCPS                 .....
A9AWD5 | Haur_2145            .....
P33247 | SHC                   .....
Q38802 | AtCPS                 THISKVLFQKV

```



**Supplementary Fig. 7.** HPLC chromatograms showing in vitro enzyme reactions of Tpn2 and mutants after desphosphorylation.

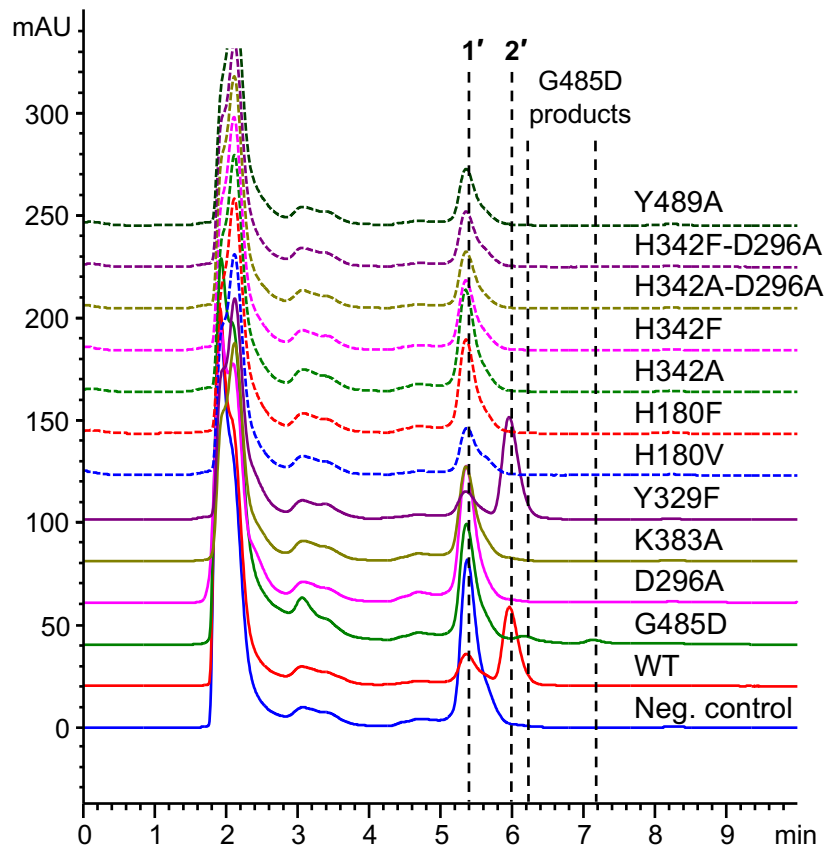

**Supplementary Fig. 8.** Scheme of the in vivo terpenoid upregulation system used in *E. coli* for heterologous production of Tpn2 products.<sup>3</sup>

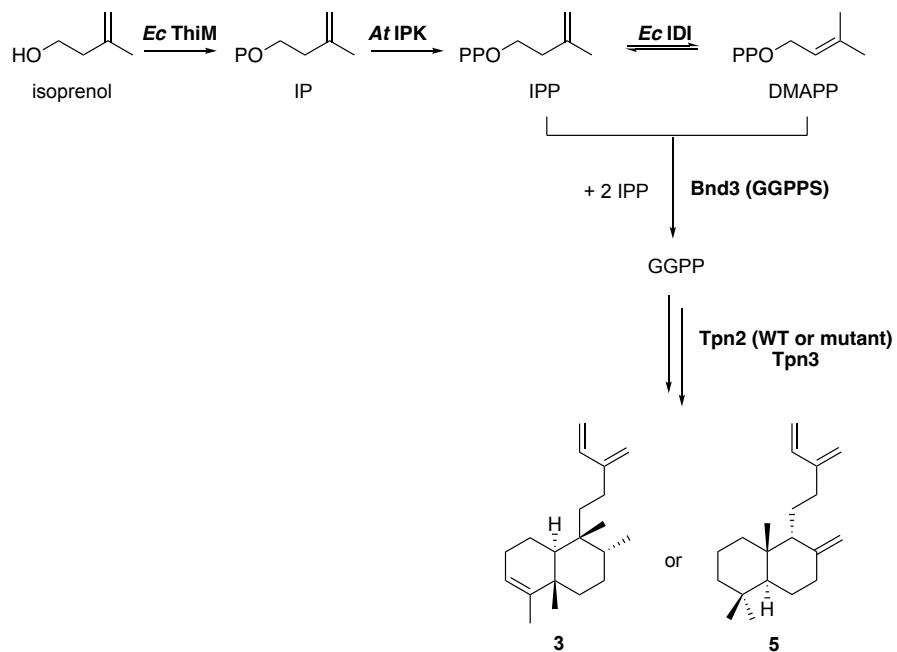

**Supplementary Fig. 9.** HPLC analysis showing production of terpentetriene (**3**) in vivo using the MKI4 system. The acyclic compounds **6** and **7** are produced via diphosphate elimination of GGPP by Tpn3.

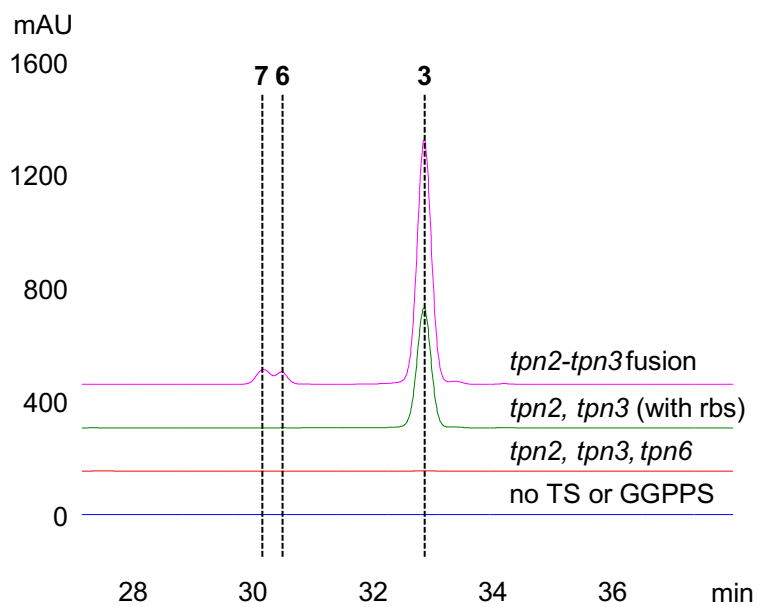

Supplementary Fig. 10.  $^1\text{H}$  NMR spectrum of terpentetriene (**3**) in  $\text{CDCl}_3$  (600 MHz).

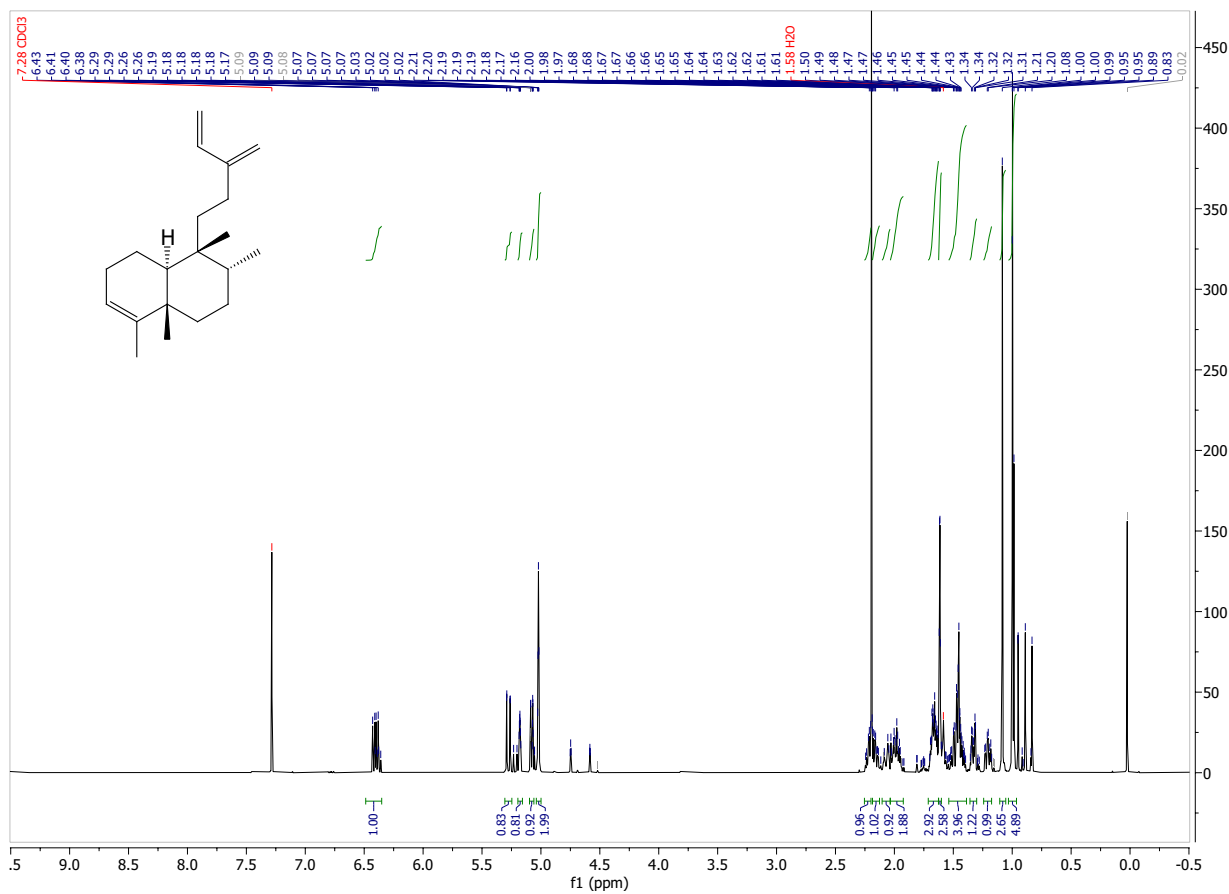

Supplementary Fig. 11.  $^{13}\text{C}$  NMR spectrum of terpentetriene (**3**) in  $\text{CDCl}_3$  (151 MHz).

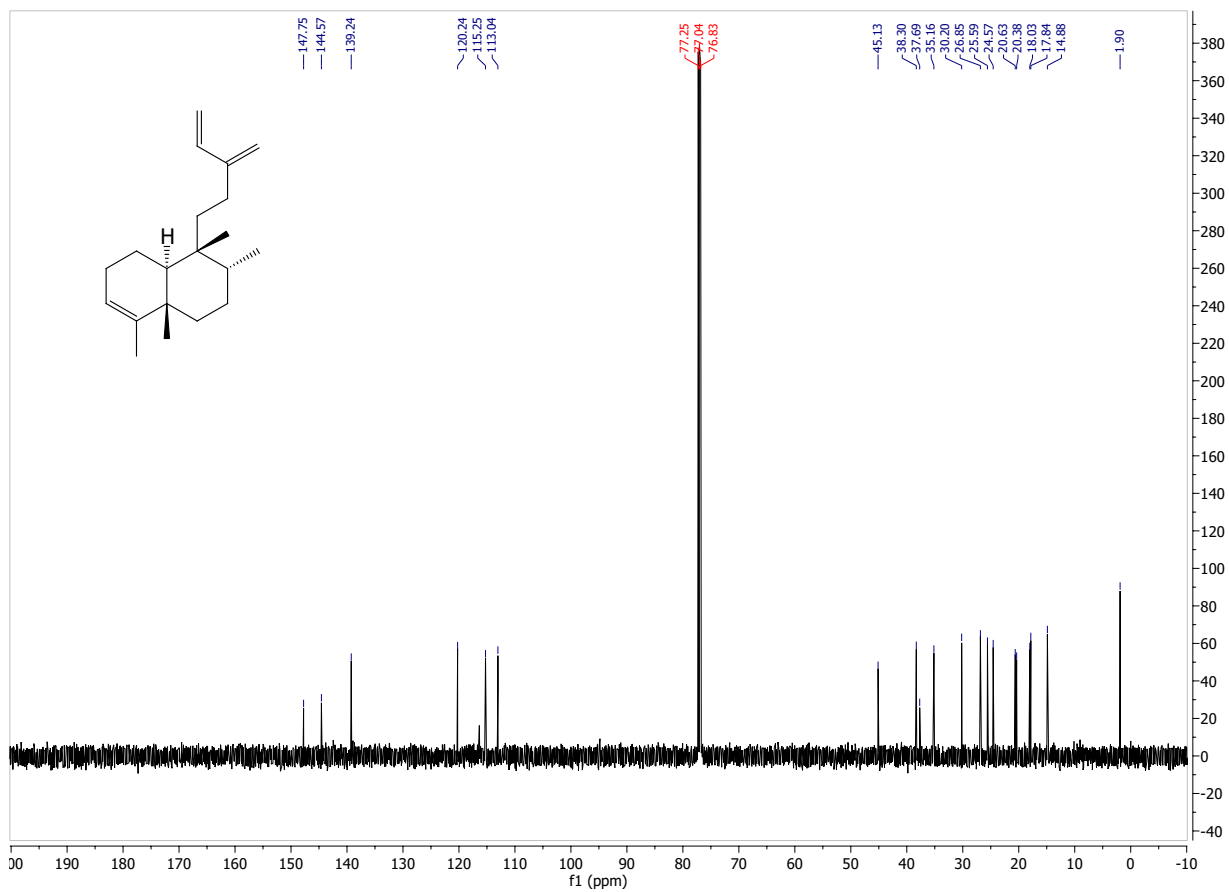

**Supplementary Fig. 12.** GC-MS analysis of *in vivo* products from Tpn2-Tpn3 and Tpn2<sup>G485D</sup>-Tpn3 fusion proteins using the MKI4 system. Extracts of Tpn2-Tpn3 (a) and Tpn2<sup>G485D</sup>-Tpn3 (b) revealed the production of major products **3** and **5**, respectively. The acyclic compounds **6** and **7** are produced via diphosphate elimination of GGPP by Tpn3. Two additional compounds produced by Tpn2<sup>G485D</sup>-Tpn3 are proposed to be diterpene-related based on their *m/z* values of 272 and 290 and comparison to the NIST database (NIST Mass Spectral Search Program for the NIST/EPA/NIH Mass Spectral Library, Version 2.3, build May 4, 2017); the titers of these compounds were too low for isolation.

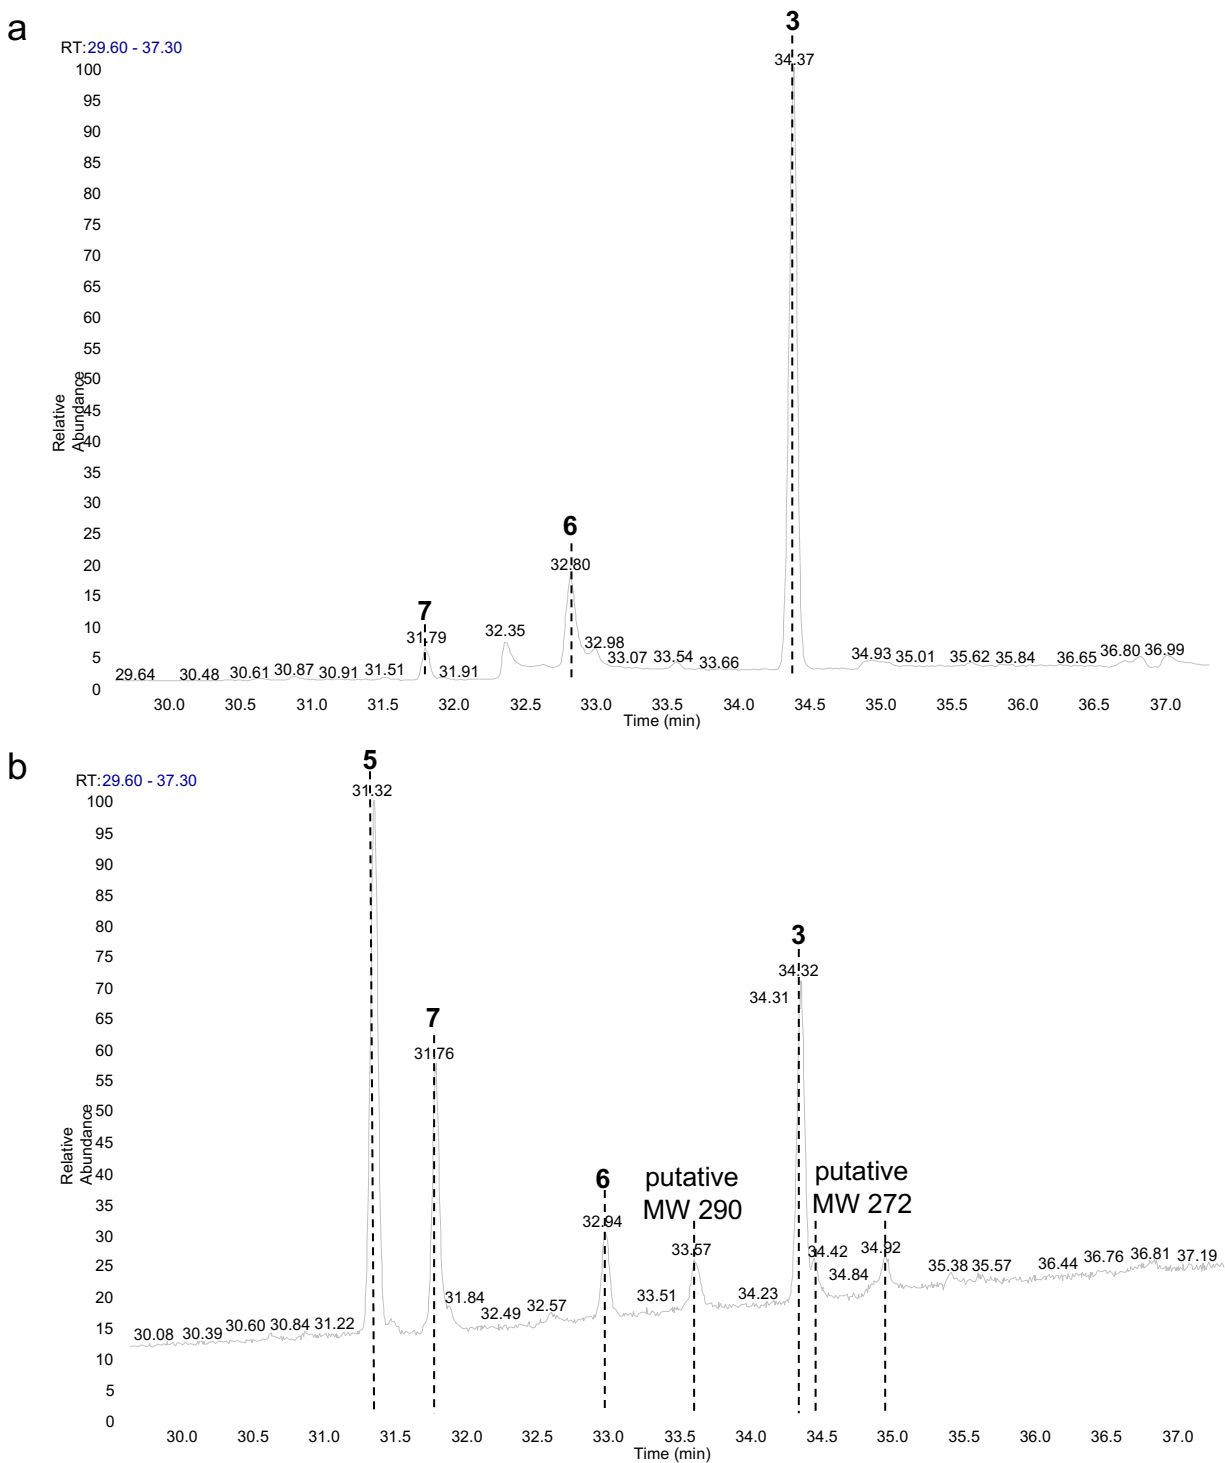

Supplementary Fig. 13. <sup>1</sup>H NMR spectrum of α-springene (6) in CDCl<sub>3</sub> (600 MHz).

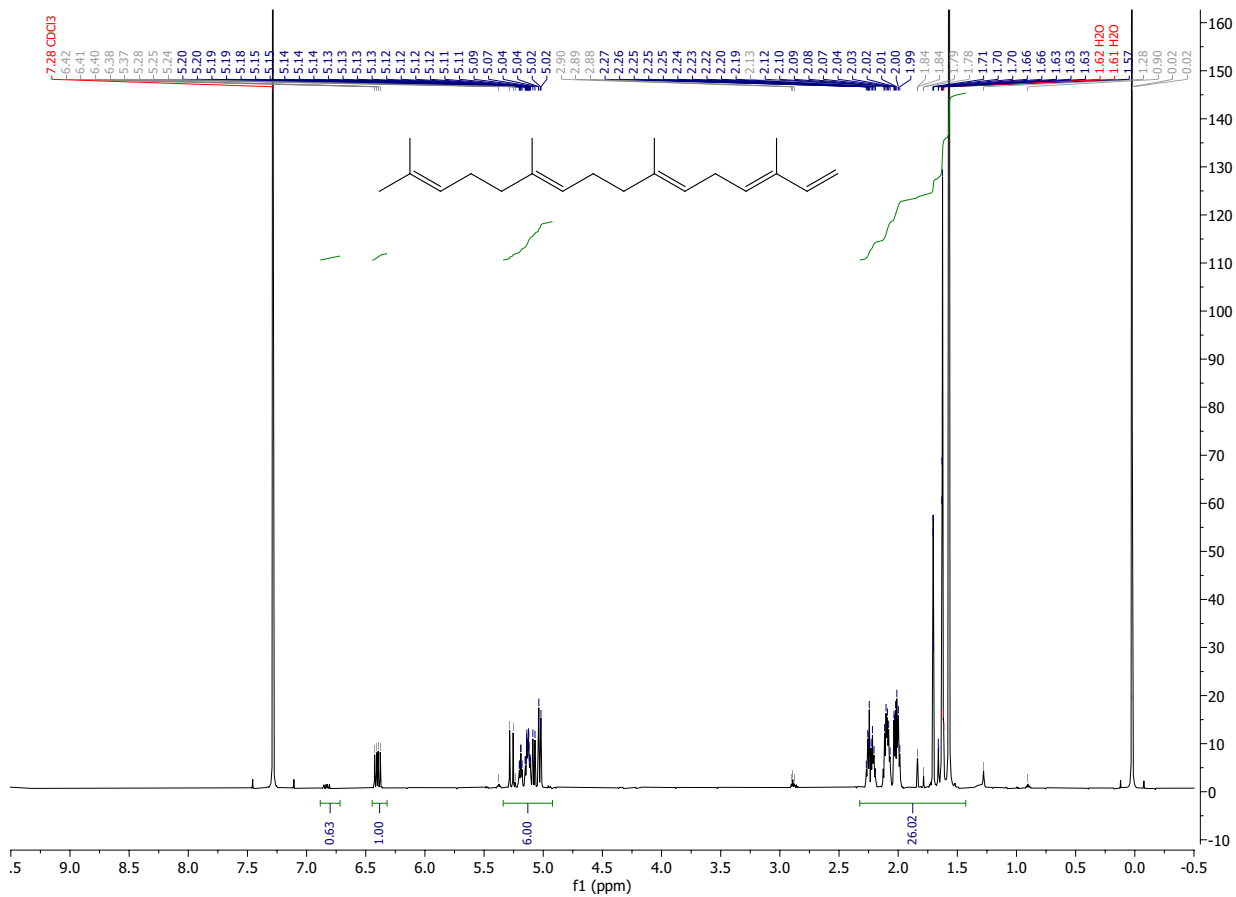

Supplementary Fig. 14. <sup>1</sup>H NMR spectrum of β-springene (7) in CDCl<sub>3</sub> (600 MHz).

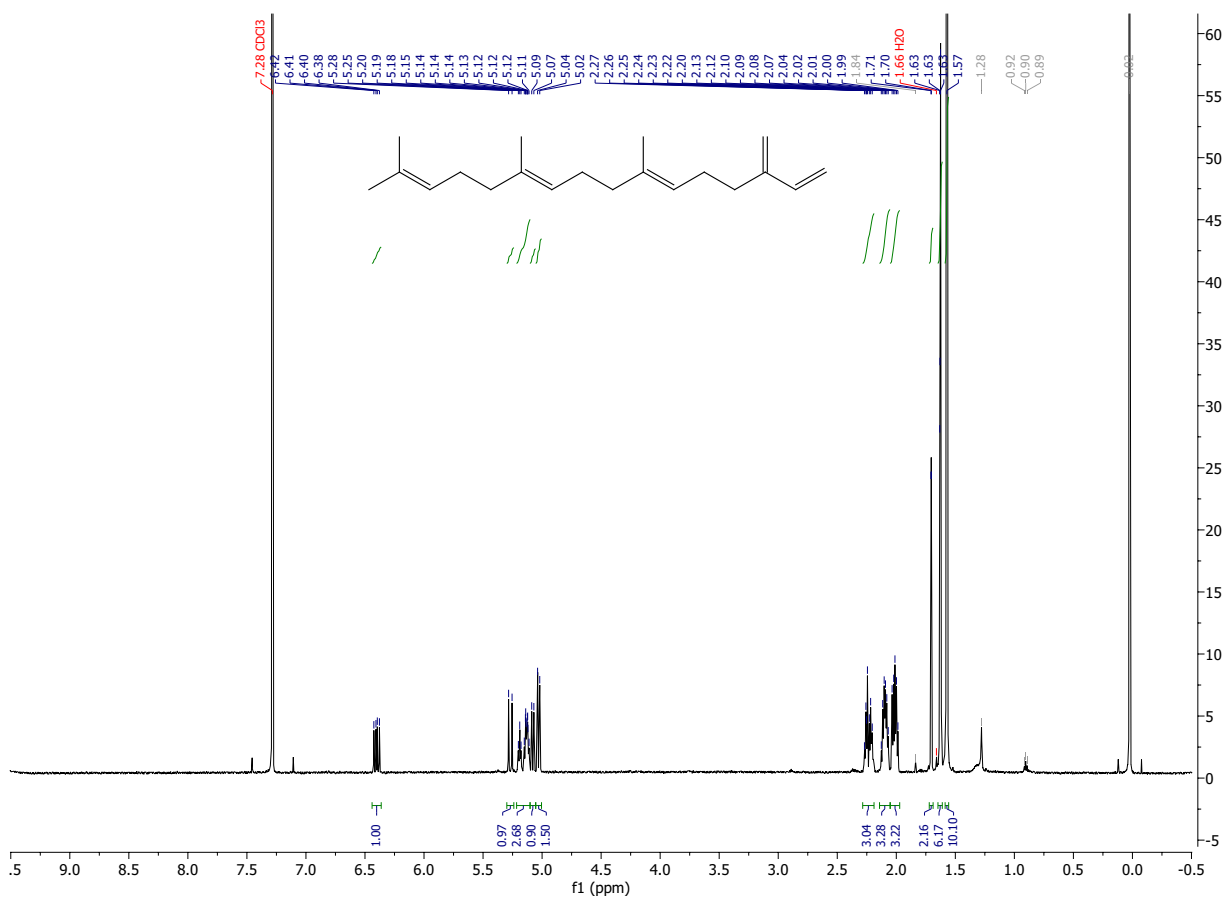



Supplementary Fig. 15.  $^1\text{H}$  NMR spectrum of *syn*-sclarene (**5**) in  $\text{CDCl}_3$  (600 MHz).

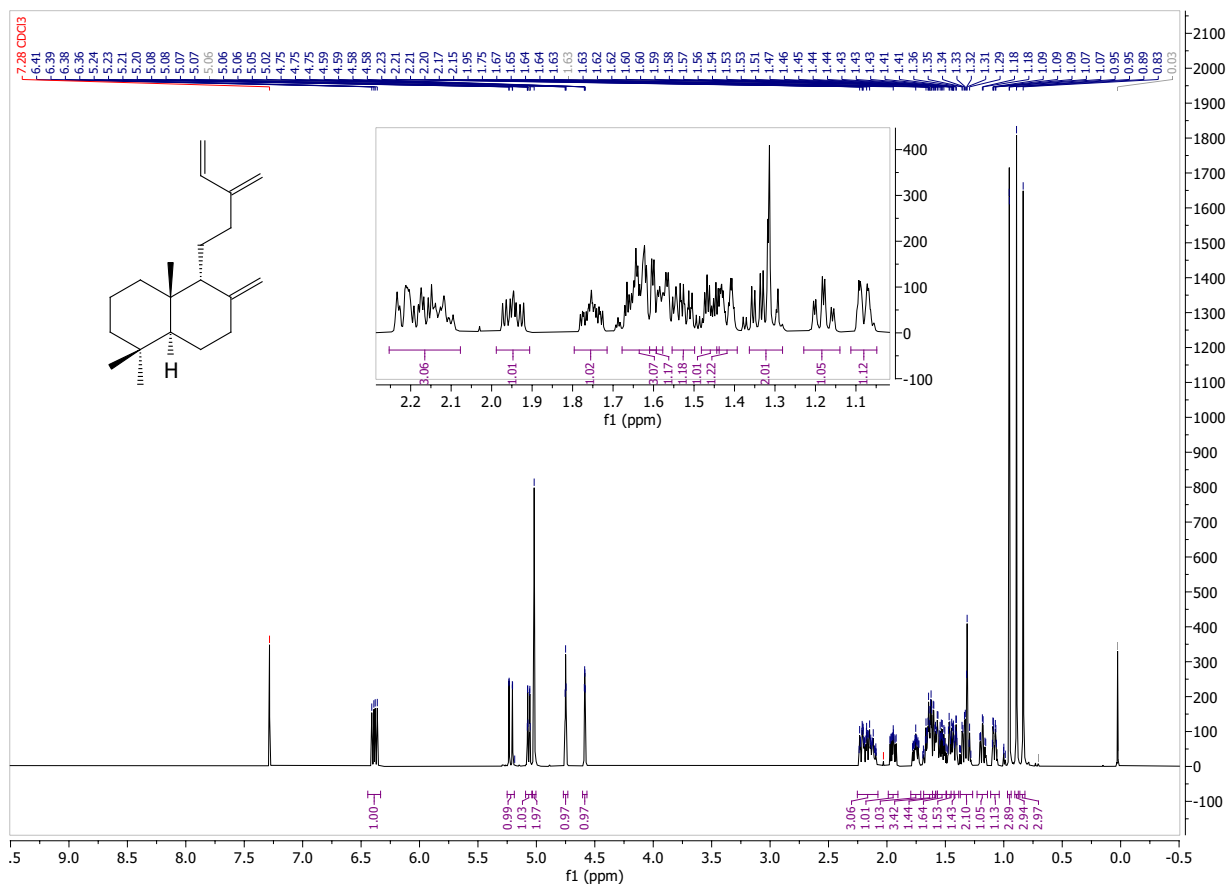

Supplementary Fig. 16.  $^{13}\text{C}$  NMR spectrum of *syn*-sclarene (**5**) in  $\text{CDCl}_3$  (151 MHz).

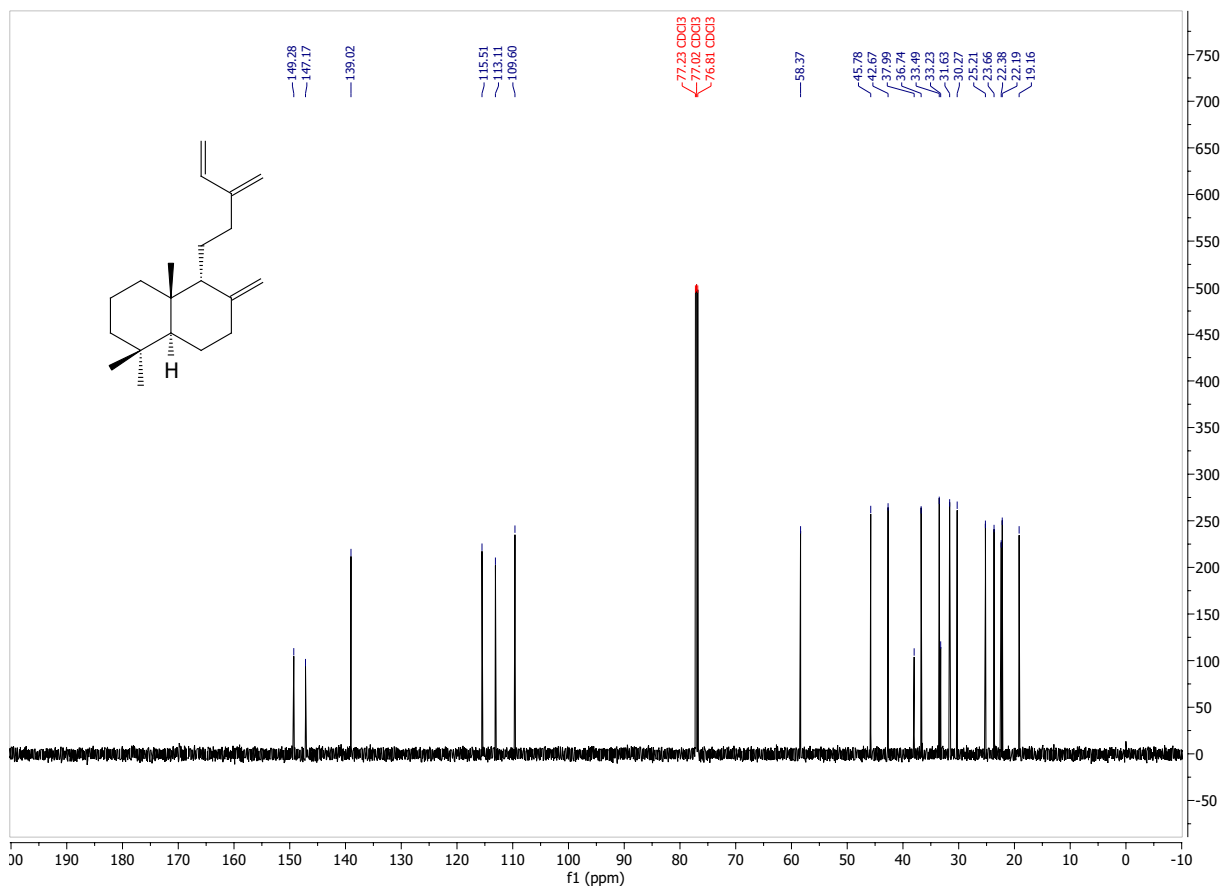

**Supplementary Fig. 17.** HSQC spectrum of *syn*-sclarene (**5**) in CDCl<sub>3</sub>. Blue cross peaks represent –CH or –CH<sub>3</sub>; orange represent –CH<sub>2</sub>.

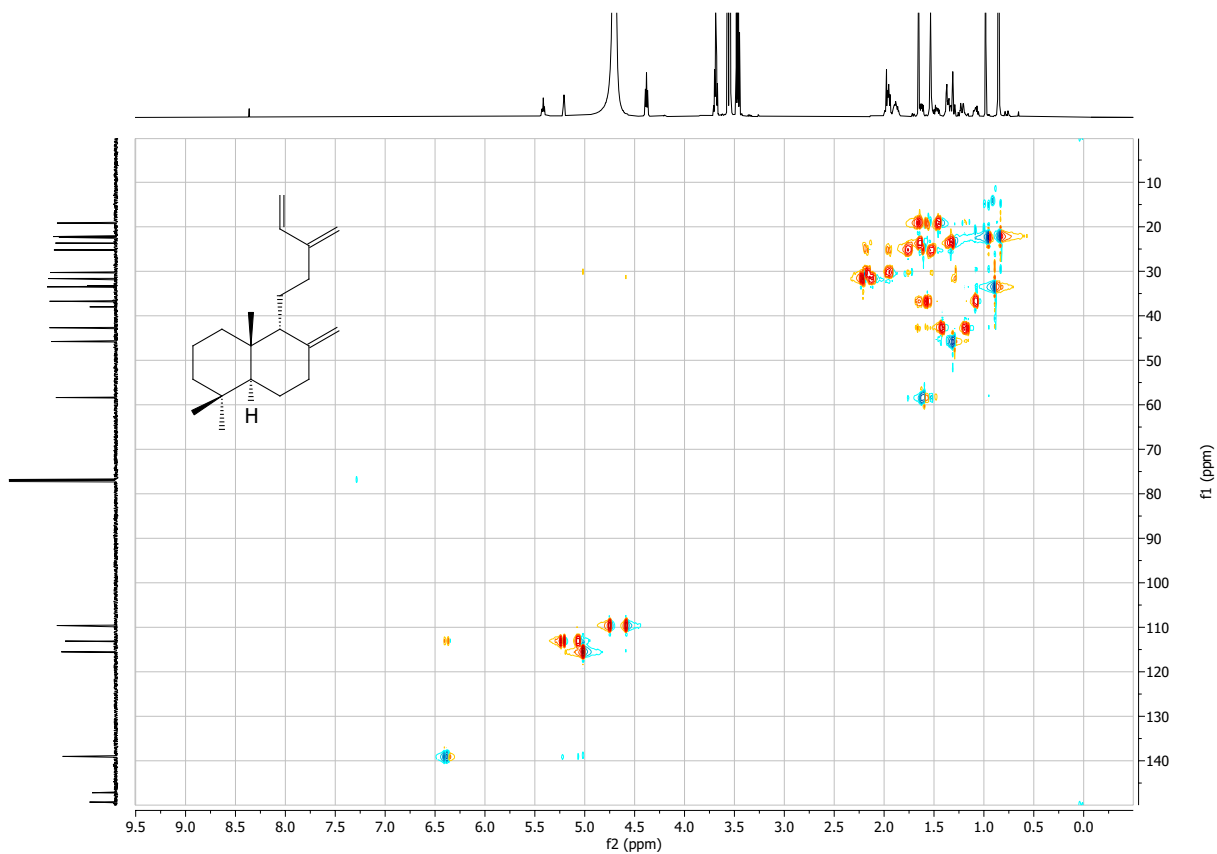

Supplementary Fig. 18. HMBC spectrum of *syn*-sclarene (**5**) in CDCl<sub>3</sub>.

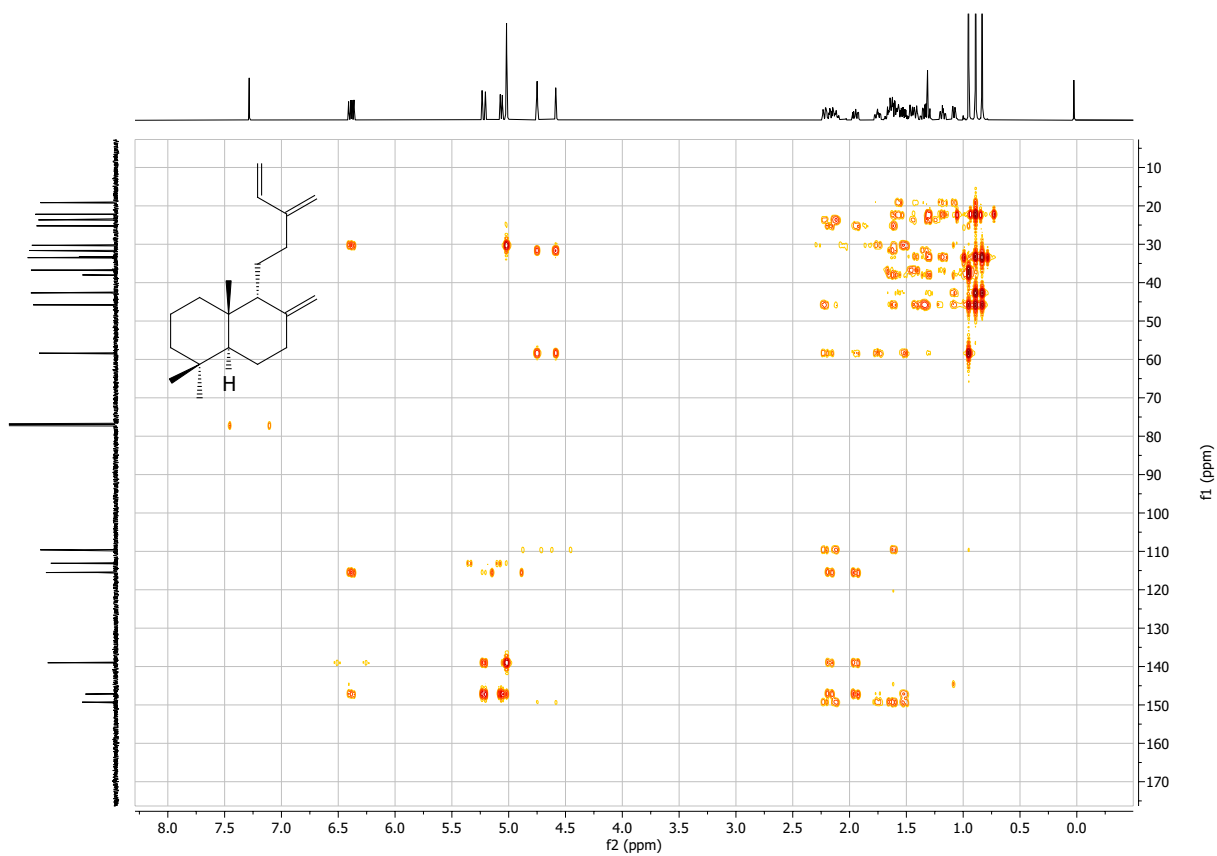

Supplementary Fig. 19. COSY spectrum of *syn*-sclarene (**5**) in CDCl<sub>3</sub>.

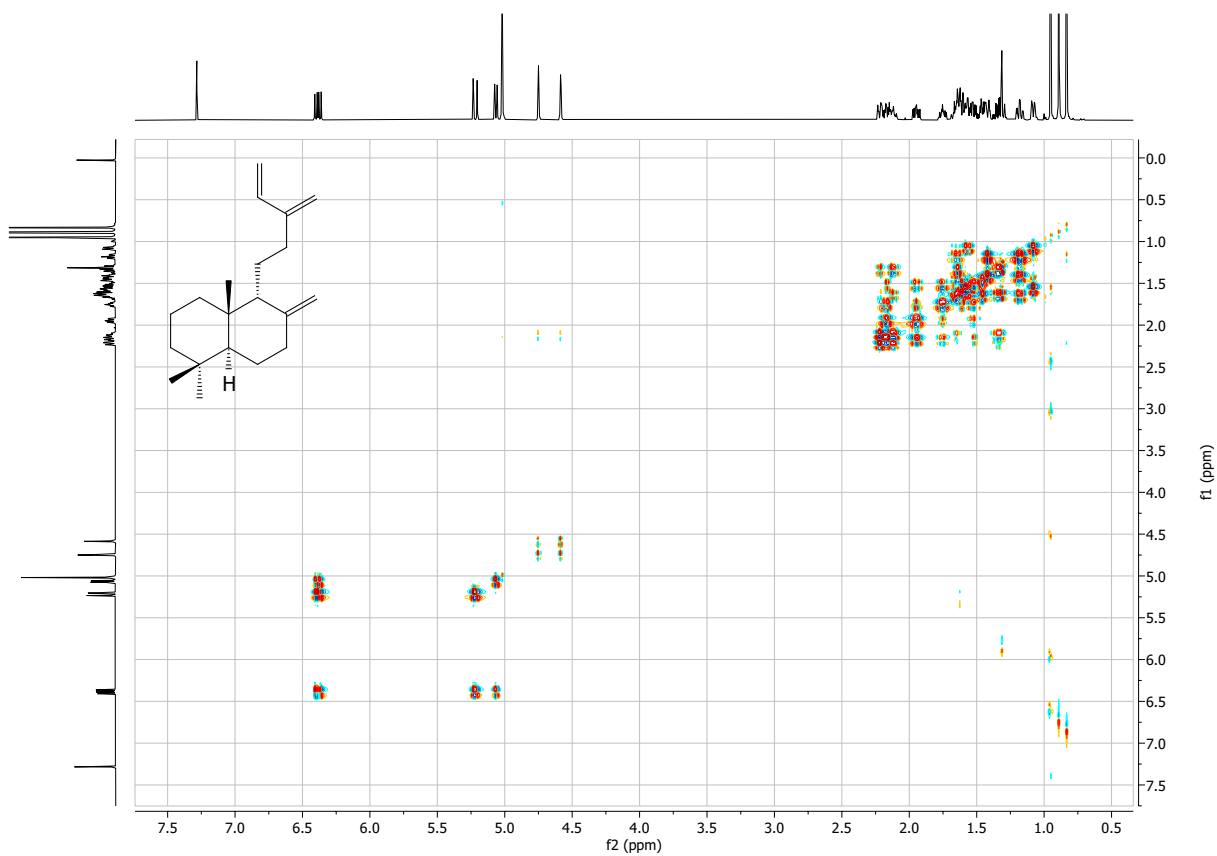

**Supplementary Fig. 20.** 2D NOESY spectrum of *syn*-sclarene (**5**) in CDCl<sub>3</sub> with key NOE correlations shown.

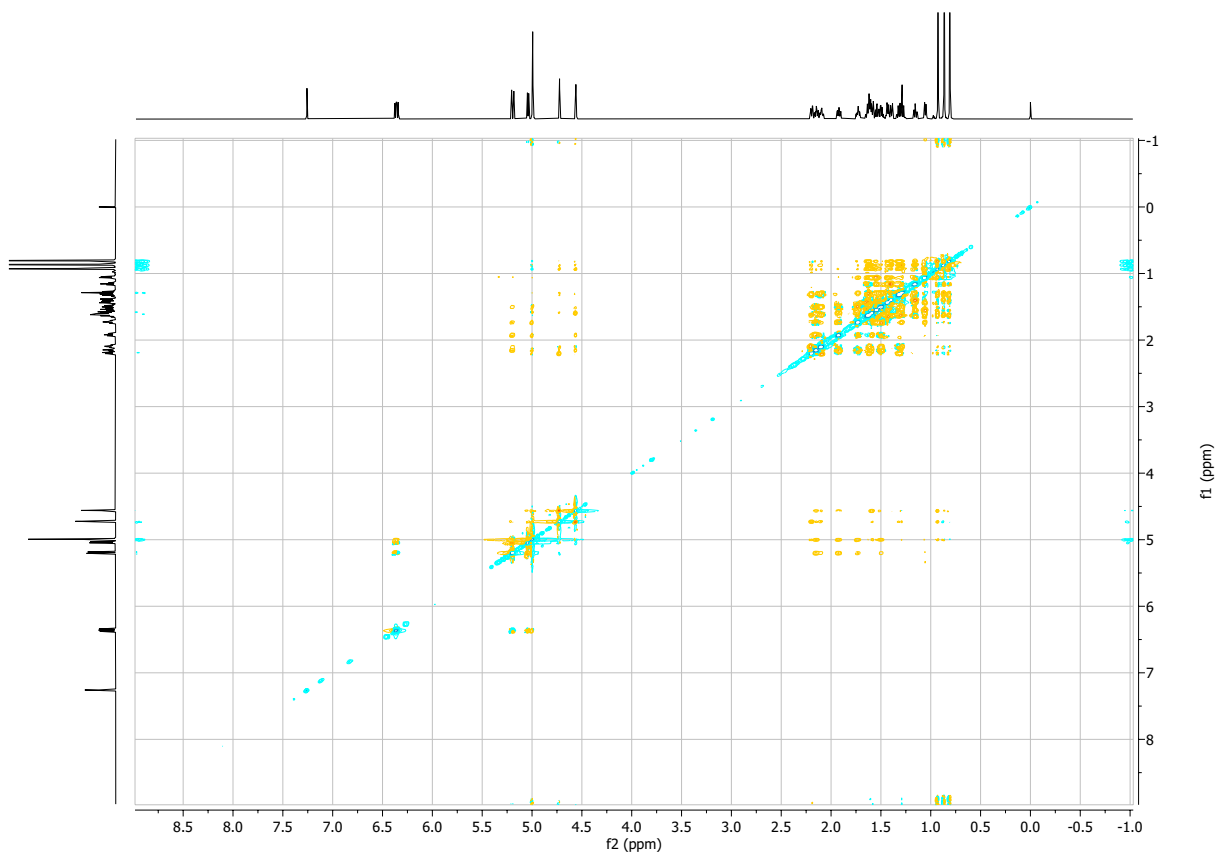

**Supplementary Fig. 21.** HPLC analysis of in vivo products from Tpn2<sup>G485E</sup>-Tpn3 fusion protein using the MKI4 system.

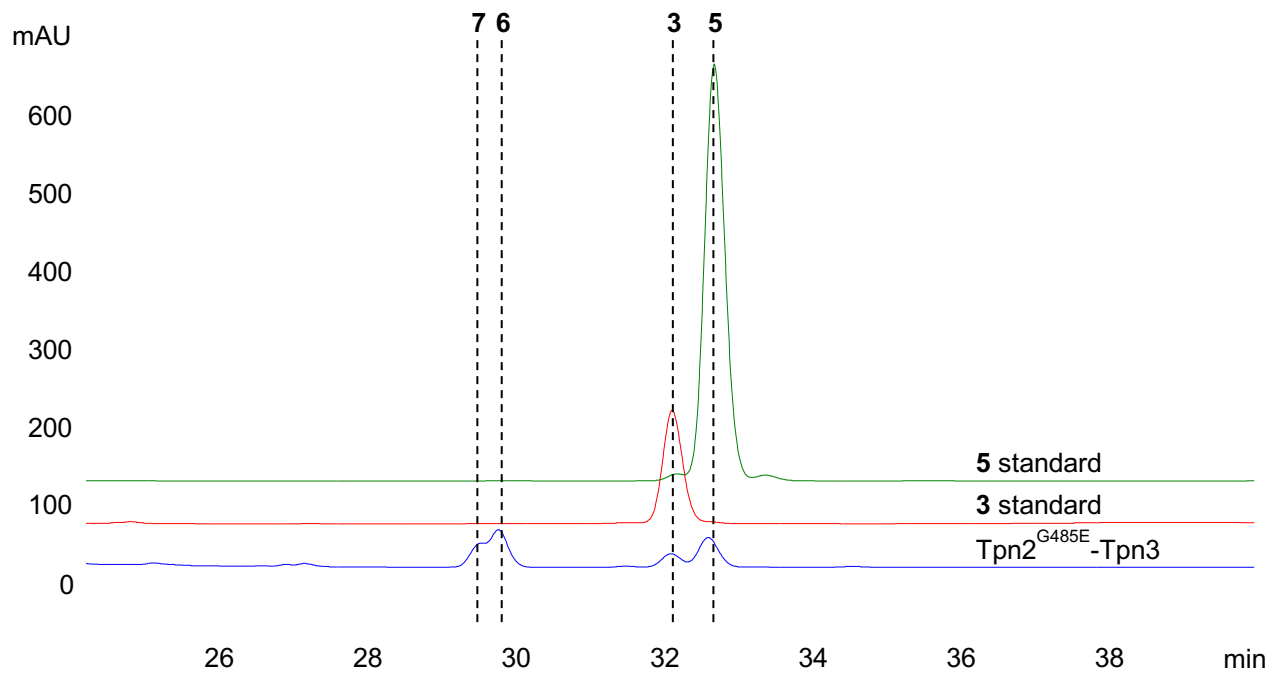

**Supplementary Fig. 22.** Genome neighborhood network of bacterial type II TSs.

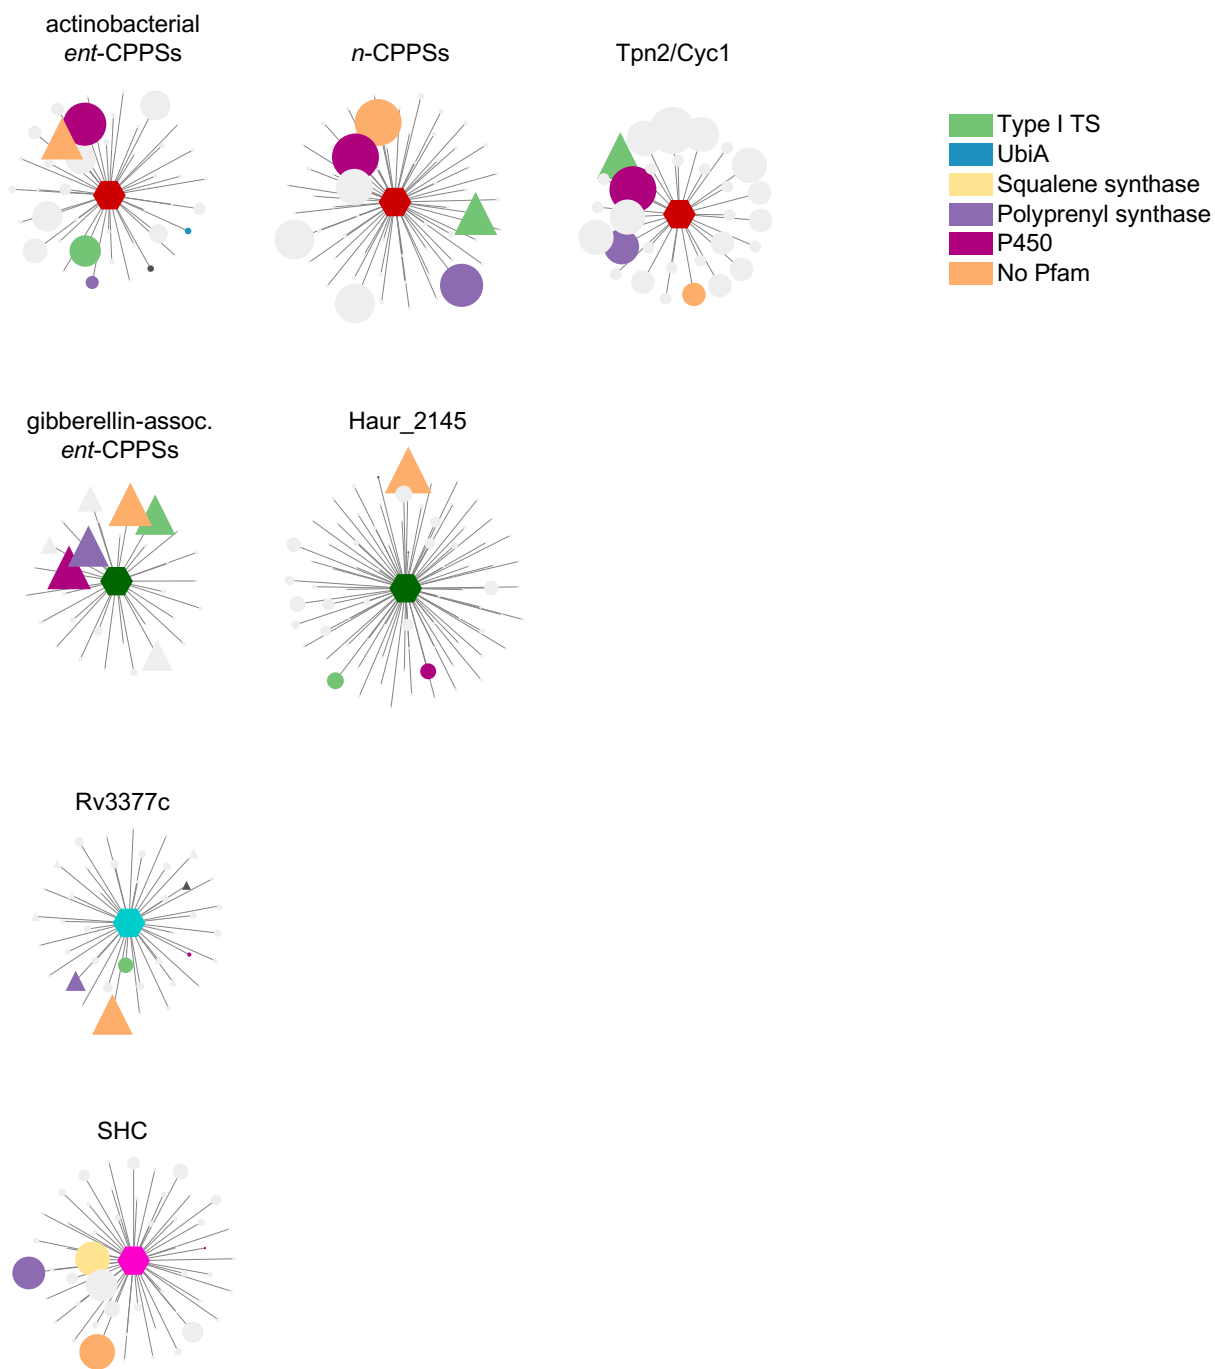



### Supplementary References

- 1 Pan, G., et al., Discovery of the leinamycin family of natural products by mining actinobacterial genomes. *Proc. Natl. Acad. Sci. U. S. A.* **114**, E11131–E11140 (2017).
- 2 Lohman, J. R., Bingman, C. A., Phillips, G. N. & Shen, B., Structure of the bifunctional acyltransferase/decarboxylase LnmK from the leinamycin biosynthetic pathway revealing novel activity for a double-hot-dog fold. *Biochemistry* **52**, 902–911 (2013).
- 3 Xu, B., Ning, W., Wei, X. & Rudolf, J. D., Mutation of the eunicellane synthase Bnd4 alters its product profile and expands its prenylation ability. Preprint at 10.26434/chemrxiv-2022-3vsmz (2022).
- 4 Thompson, J. D., Higgins, D. G. & Gibson, T. J., CLUSTAL W: improving the sensitivity of progressive multiple sequence alignment through sequence weighting, position-specific gap penalties and weight matrix choice. *Nucleic Acids Res.* **22**, 4673–4680 (1994).
- 5 Robert, X. & Gouet, P., Deciphering key features in protein structures with the new ENDscript server. *Nucleic Acids Res.* **42**, W320–W324 (2014).
