# Supplementary material for: Structure-guided product determination of the bacterial type II diterpene synthase Tpn2
Source: PubMed Central journal article supplement (PMC9814783; doi:10.1038/s42004-022-00765-6), 2022-11-08
Supplement: 42004_2022_765_MOESM3_ESM.pdf [file 42004_2022_765_MOESM3_ESM.pdf]

# Description of Additional Supplementary Files

**File name:** Supplementary Data 1

**Description:** PDB file

**File name:** Supplementary Data 2

**Description:** PDB Validation Report
